# Supplementary material for: A pedigree-based prediction model identifies carriers of deleterious de novo mutations in families with Li-Fraumeni syndrome
Source: HighWire-hosted journal article supplement (doi:10.1101/gr.249599.119), 2020-08-01

# Figures for Famdenovo Output

## Contents

|                                                                                 |    |
|---------------------------------------------------------------------------------|----|
| 1. ROC . . . . .                                                                | 2  |
| 1.1 Structure of the data sets . . . . .                                        | 2  |
| 1.2 ROC curve . . . . .                                                         | 2  |
| 2. “de novo” probabilities in validation and discovery sets . . . . .           | 3  |
| 2.1 Structure of the data sets . . . . .                                        | 3  |
| 3. Parental and diagnosis age analysis . . . . .                                | 6  |
| 3.1 Structure of the data set in this section . . . . .                         | 6  |
| 4. Supplementary: Distribution of family size in LFS and BRCA cohorts . . . . . | 9  |
| 5.1 Supplementary: Structure of the data sets in this section . . . . .         | 9  |
| 5.2 Supplementary: Plots of Family Size Distributions . . . . .                 | 10 |

# 1. ROC

## 1.1 Structure of the data sets

The data sets in section 1 have the following structure.

```
# (mda.family, nci.family, chop.family, dfci.family)
# structure for the data set using mda as an example
knitr::kable(data.frame(
  Variables = colnames(comb4),
  Meaning = c("Family ID", "Truth", "De Novo Probability")
), align = 'c')
```

| Variables | Meaning             |
|-----------|---------------------|
| fam.id    | Family ID           |
| truth     | Truth               |
| prob      | De Novo Probability |

```
# these are the first 3 rows
knitr::kable(head(comb4, n=3), align = 'c')
```

| fam.id | truth | prob      |
|--------|-------|-----------|
| 79     | 0     | 0.0011513 |
| 80     | 0     | 0.0000202 |
| 81     | 0     | 0.8014998 |

## 1.2 ROC curve

```
# get roc object
rocobj = roc(comb4$truth, comb4$prob)
rocobj$fpr <- 1-rocobj$specificities
rocobj$tpr <- rocobj$sensitivities

# get ci
ci_rocobj = ci.thresholds(rocobj, boot.n=1000)
rocobj_ci_specificity <- as.vector(ci_rocobj$specificity[,2])
ci_rocobj_fpr <- 1- rocobj_ci_specificity
ci_rocobj_upper_bound <- as.vector(ci_rocobj$sensitivity[,3])
ci_rocobj_lower_bound <- as.vector(ci_rocobj$sensitivity[,1])

# plot the ROC
par(mar=c(4,4,1,1))
plot(y=rocobj$sensitivities, x=1-rocobj$specificities,ylab="True Positive Rate",
     xlab="False Positive Rate", xlim = c(0.03,0.99), ylim = c(0.03,0.99), type='l')
polygon(c(ci_rocobj_fpr , rev(ci_rocobj_fpr )), c(ci_rocobj_upper_bound, rev(ci_rocobj_lower_bound)), col="red", lwd=3)
lines(y=rocobj$sensitivities, x=1-rocobj$specificities, lwd=3)
points(c(1 - 0.9514, 1 - 0.9306, 1 - 0.9167, 1 - 0.8750), c(0.7143, 0.7619, 0.7857, 0.8810), col = "red", lwd=3)
points(roc.relaxed$fpr, roc.relaxed$tpr, col="purple", pch=23)
```

```

points(roc.stringent$tpr~roc.stringent$fpr, col = "darkorange", pch = 8, cex = 1.2)
legend('bottomright', legend=c('Famdenovo', 'Criterion 1', 'Criterion 2','95% CI'),
      pch=c(15, 23,8,15), pt.cex=c(1,1,1,2), box.lwd = 0,box.col = "white",bg = "white",
      col=c('black', 'purple', 'darkorange', 'cadetblue1'), inset=0.01)
abline(h = roc.relaxed$tpr[9], col = "gray", lty = 2) # age 45
abline(h = roc.relaxed$tpr[13], col = "gray", lty = 2) # age 65
text(y=age_points_stringent$tpr,x=age_points_stringent$fpr+0.035,labels=age_points_stringent$age.cut, col="black")
text(y=age_points_relaxed$tpr,x=age_points_relaxed$fpr-0.035,labels=age_points_relaxed$age.cut, col="purple")
text(x=c(1 - 0.9514-0.03, 1 - 0.9306-0.04, 1 - 0.9167-0.04, 1 - 0.8750-0.04), y=c(0.7143, 0.7619, 0.785

```

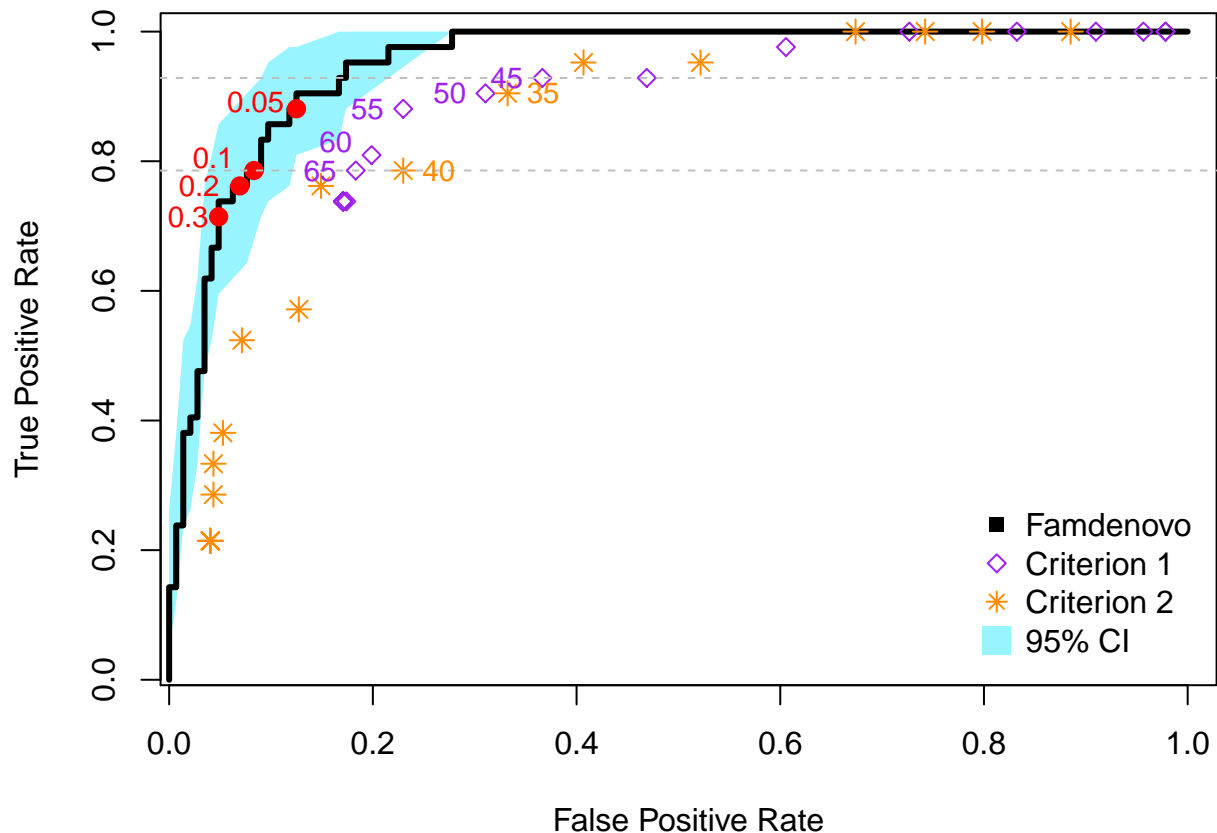

## 2. “de novo” probabilities in validation and discovery sets

### 2.1 Structure of the data sets

The data sets in section 2 have the following structure.

```

# (mda.valid.extract, nci.valid.extract, chop.valid.extract, dfci.valid.extract)
# structure for the data set using mda.valid as an example
knitr::kable(data.frame(
  Variables = colnames(mda.valid.extract),
  Meaning = c("Family ID", "De Novo Probability", "True State", "Prediction", "Is The Prediction Correct"),
  align = 'c')

```

| Variables | Meaning                   |
|-----------|---------------------------|
| fam.id    | Family ID                 |
| prob      | De Novo Probability       |
| truth     | True State                |
| pred      | Prediction                |
| ifcorr    | Is The Prediction Correct |

```
# these are the first 3 rows
knitr::kable(head(mda.valid.extract, n=3), align = 'c')
```

| fam.id | prob      | truth | pred  | ifcorr |
|--------|-----------|-------|-------|--------|
| 171    | 0.0026731 | FALSE | FALSE | TRUE   |
| 172    | 0.2808838 | TRUE  | TRUE  | TRUE   |
| 173    | 0.2214413 | TRUE  | TRUE  | TRUE   |

```
# (mda.disc.extract, nci.disc.extract, chop.disc.extract, dfci.disc.extract)
# structure for the data set using mda disc as an example
knitr::kable(data.frame(
  Variables = colnames(mda.disc.extract),
  Meaning = c("Family ID", "De Novo Probability")
), align = 'c')
```

| Variables | Meaning             |
|-----------|---------------------|
| fam.id    | Family ID           |
| prob      | De Novo Probability |

```
# these are the first 3 rows
knitr::kable(head(mda.disc.extract, n=3), align = 'c')
```

| fam.id | prob      |
|--------|-----------|
| 170    | 0.0004403 |
| 175    | 0.0422781 |
| 177    | 0.0000004 |

```
# ----- De Novo Probability ----- #
# validation set
valid <- rbind(data.frame(name="MDA (26/82)", prob=mda.valid.extract$prob, truth=mda.valid.extract$truth),
  data.frame(name="NCI (10/66)", prob=nci.valid.extract$prob, truth=nci.valid.extract$truth),
  data.frame(name="DFCI (4/30)", prob=dfci.valid.extract$prob, truth=dfci.valid.extract$truth),
  data.frame(name="CHOP (2/8)", prob=chop.valid.extract$prob, truth=chop.valid.extract$truth))

# plot the distribution on the validation set
ggplot(valid, aes(factor(name, levels=c("MDA (26/82)", "NCI (10/66)", "DFCI (4/30)", "CHOP (2/8)")), prob,
  geom_violin(color="gray") + geom_jitter(height=0, width=0.2, aes(color=truth), size = 3) +
  geom_hline(yintercept=0.2, color="gray", linetype="dashed") +
  labs(title="TP53 de novo probability in the validation set", x="", y="TP53 de novo probability") +
```

```

theme(panel.background=element_blank(),
      plot.title=element_text(size = 20, hjust=0.5),
      axis.text = element_text(size = 10),
      axis.title = element_text(size = 10)) +
guides(color=FALSE)

```

## TP53 de novo probability in the validation set

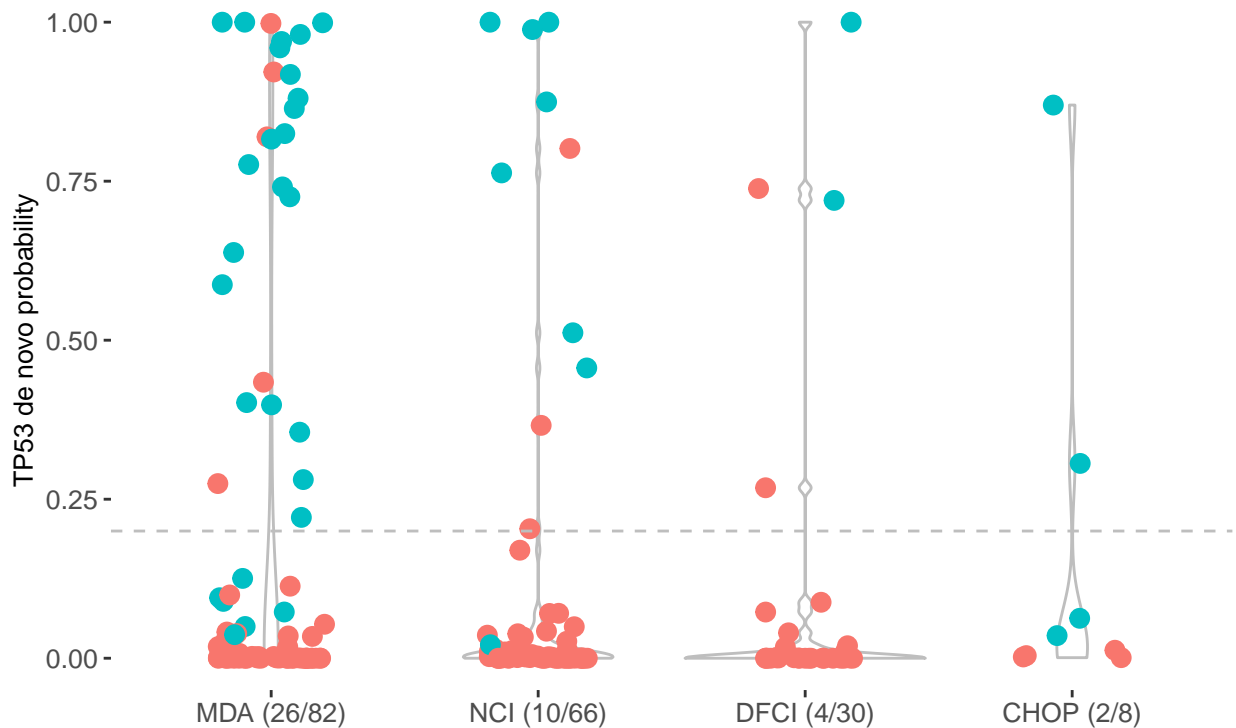

```

# discovery
disc <- rbind(data.frame(name="MDA (23/58)", prob=mda.disc.extract$prob),
             data.frame(name="NCI (7/12)", prob=nci.disc.extract$prob),
             data.frame(name="DFCI (7/61)", prob=dfci.disc.extract$prob),
             data.frame(name="CHOP (3/7)", prob=chop.disc.extract$prob))
disc$pred <- disc$prob >= 0.2

# plot the distribution on the discovery set
ggplot(disc, aes(factor(name, levels=c("MDA (23/58)", "NCI (7/12)", "DFCI (7/61)", "CHOP (3/7)")), prob)) +
  geom_violin(color="gray") +
  geom_point(position=position_jitter(width = 0.2), shape = 21, color=ifelse(disc$pred == TRUE, 'gray50', 'red')) +
  geom_hline(yintercept=0.2, color="gray", linetype="dashed") +
  labs(title="TP53 de novo probability in the discovery set", x="", y="TP53 de novo probability") +
  theme(panel.background=element_blank(),
        plot.title=element_text(size = 20, hjust=0.5),
        axis.text = element_text(size = 10),
        axis.title = element_text(size = 10))+
  guides(color=FALSE)

```

# TP53 de novo probability in the discovery set

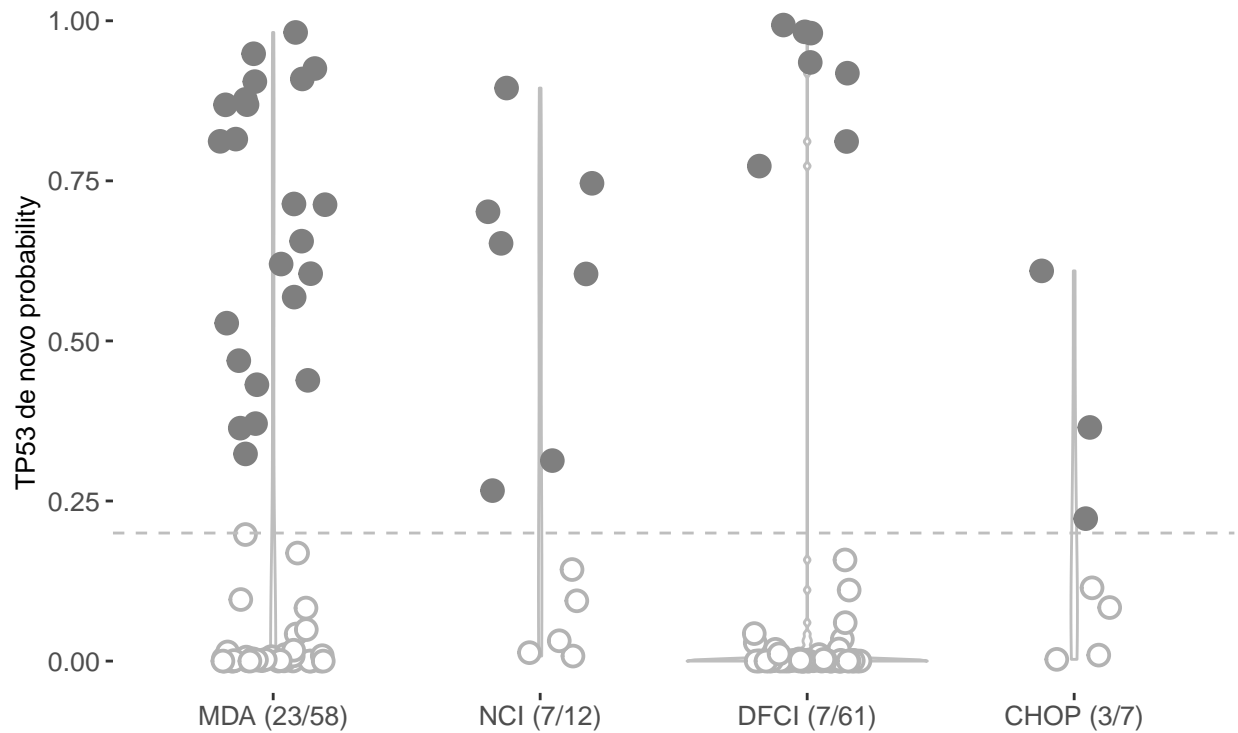

## 3. Parental and diagnosis age analysis

### 3.1 Structure of the data set in this section

The data set used in this section considers only the probands of each family and has the following structure.

```
# first 3 rows
knitr::kable(head(probands3, n=3), align = 'c')
```

| institution.x | Nu.ID | Nu.Fam | prob      | truth    | paternal.age | maternal.age | proband | Fam. |
|---------------|-------|--------|-----------|----------|--------------|--------------|---------|------|
| NCI           | 93    | 79     | 0.0000015 | familial | 29           | 24           | proband | 40   |
| NCI           | 98    | 80     | 0.0000027 | familial | 21           | 21           | proband | 68   |
| NCI           | 109   | 81     | 0.0113485 | familial | 24           | 25           | proband | 18   |

### 3.2 Several parents and probands

```
#probands 2 mother
beeswarm(as.numeric(probands3$maternal_age) ~ probands3$new_state,
         pwpch = ifelse(probands3$state == "denovo", 16, 1),
         method="swarm", ylim = c(10, 60),
         pwcol = ifelse(probands3$state == "denovo", 1, 2),
```

```

xlab = "", ylab="")
title(ylab="Maternal age (years)")
legend("topright", legend = c("de novo", "familial"), col = c(1, 2))

```

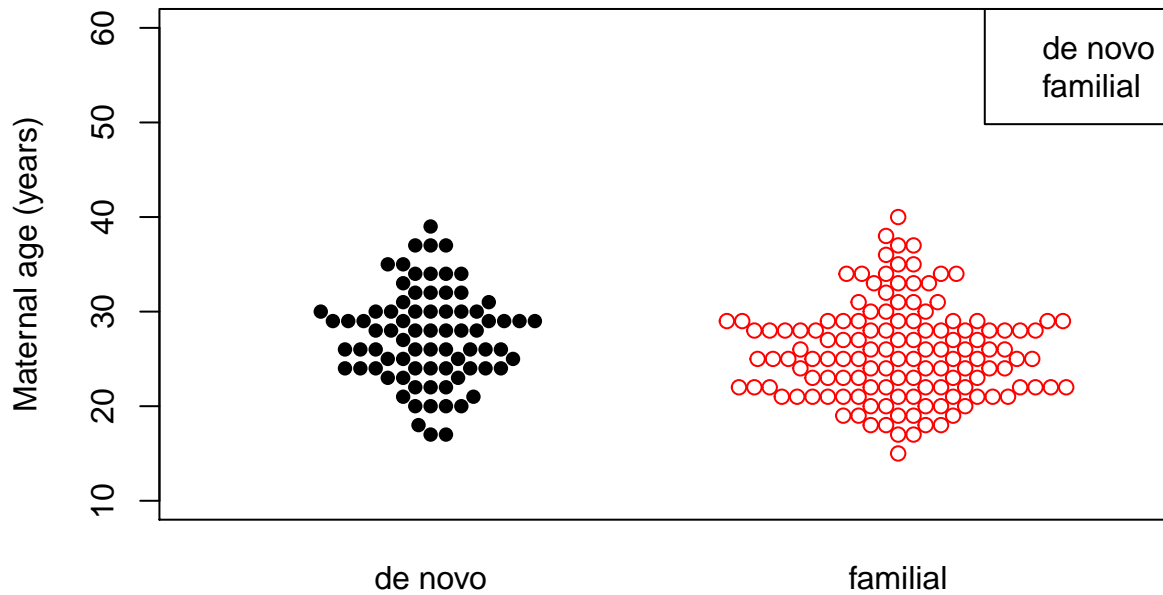

```

# probands 2 father
beeswarm(as.numeric(probands3$paternal_age) ~ probands3$new_state,
  pwpch = ifelse(probands3$state == "denovo", 16, 1),
  method="swarm", ylim = c(10, 60),
  pwc = ifelse(probands3$state == "denovo", 1, 2),
  xlab = "", ylab="")
title(ylab="Paternal age (years)")
legend("topright", legend = c("de novo", "familial"), col = c(1, 2))

```

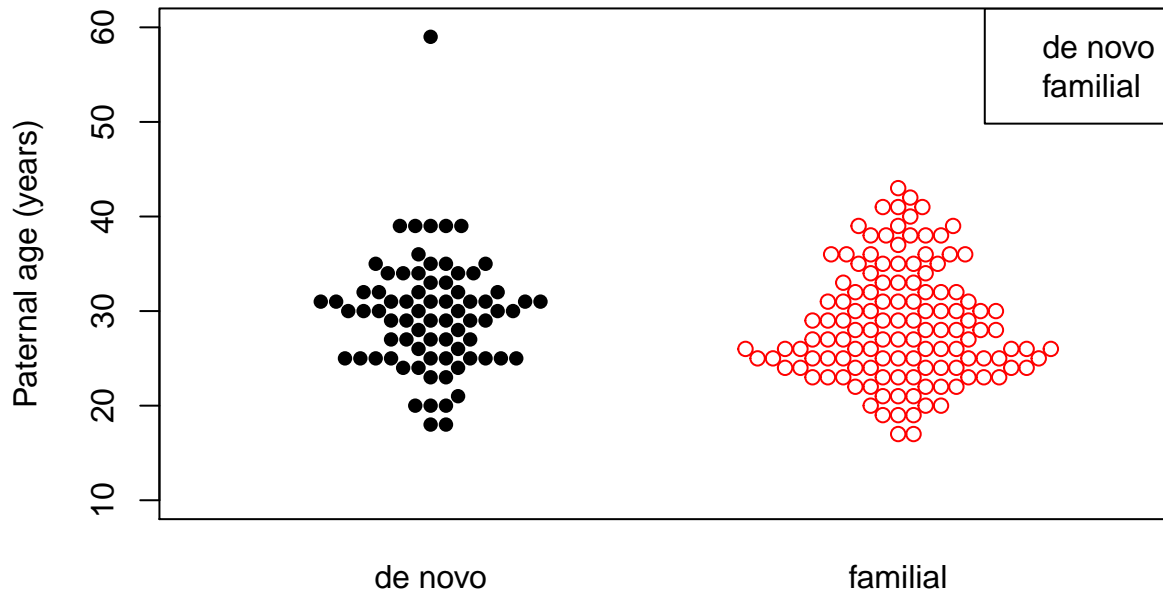

```

# all probands
par(mar=c(4,4,1,1))
beeswarm(as.numeric(probands3$diag.age.first) ~ probands3$LFS.Spectrum, #probands3$cancer.first,
         pwpch = ifelse(probands3$state == "denovo", 16, 1),
         pwcol = ifelse(probands3$gender == 0, 3, 4), method="swarm",
         ylim = c(0, 80), xlab="", ylab="", las=2)
title(ylab="Age at diagnosis (years)")
legend("topright", legend = c("de novo, females", "de novo, males", "familial, females", "familial, males"))

```



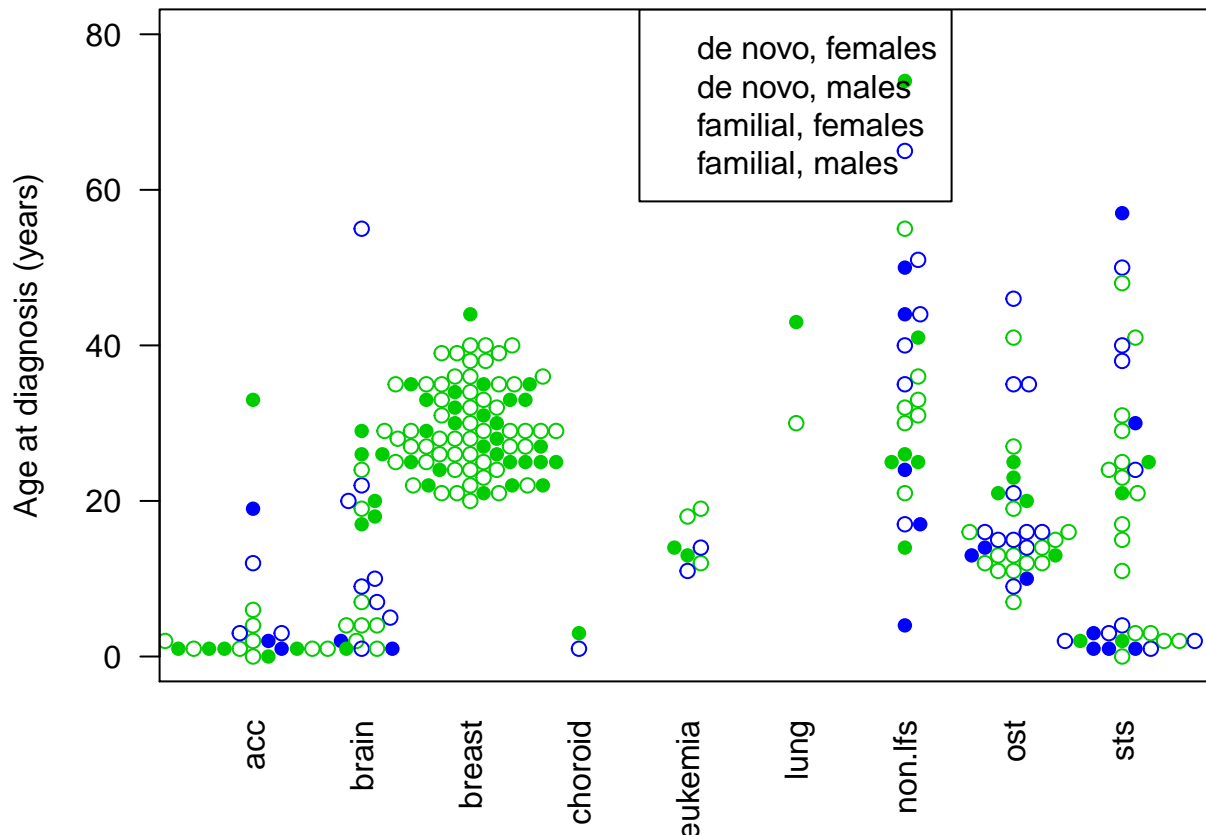

#### 4. Supplementary: Distribution of family size in LFS and BRCA cohorts

##### 5.1 Supplementary: Structure of the data sets in this section

These data sets contain the size of each family belonging to the LFS cohorts used for our Famdenovo.TP53 project and the BRCA families from the CGN cohort used for Famdenovo.BRCA. Lets take a look at the structure of these data sets.

```
# LFS data set structure
knitr::kable(data.frame(Variable = colnames(LFS_Family_Size),
                        Meaning = c("Number of Members Available in Pedigree", "Number of Pedigrees with
```

| Variable          | Meaning                                                   |
|-------------------|-----------------------------------------------------------|
| lfs_pedigree_size | Number of Members Available in Pedigree                   |
| lfs_families      | Number of Pedigrees with This Amount of Available Members |

```
# first 3 rows
knitr::kable(head(LFS_Family_Size, n =3),align = 'c' )
```

| lfs_pedigree_size | lfs_families |
|-------------------|--------------|
| 3                 | 2            |

| lfs_pedigree_size | lfs_families |
|-------------------|--------------|
| 4                 | 3            |
| 5                 | 1            |

## 5.2 Supplementary: Plots of Family Size Distributions

```
# ----- Distribution of Family Size ----- #
# LFS Data plot
plot(x=as.vector(LFS_Family_Size$lfs_pedigree_size), y=as.vector(LFS_Family_Size$lfs_families), type =
     main="LFS Data Family Size Distribution", ylab = 'No. of Families',
     xlim = c(0,150), ylim = c(0,10), xlab = "Family Size")
minor.tick(nx = 5, ny = 0)
lines(x=as.vector(LFS_Family_Size$lfs_pedigree_size), y=as.vector(LFS_Family_Size$lfs_families),
      type = 'p', pch = 19, cex = 2, col = "Blue")
```

**LFS Data Family Size Distribution**

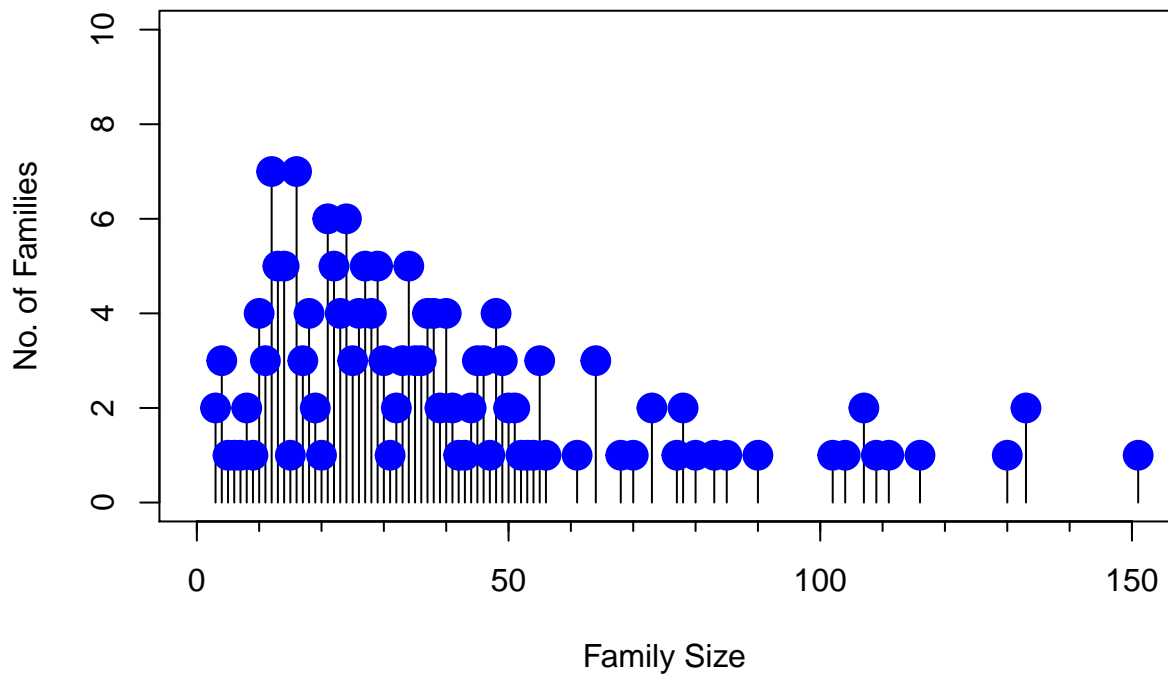

Supplement: Supplemental_Code.zip [file Figures_For_Famdenovo_Output.pdf › Supplemental_Code/Figures_For_Famdenovo_Output.pdf]
