# Supplementary material for: A pedigree-based prediction model identifies carriers of deleterious de novo mutations in families with Li-Fraumeni syndrome
Source: HighWire-hosted journal article supplement (doi:10.1101/gr.249599.119), 2020-08-01

**Supplementary Figure 1.** Distributions of pedigree sizes in the LFS dataset and the CGN-BRCA dataset.

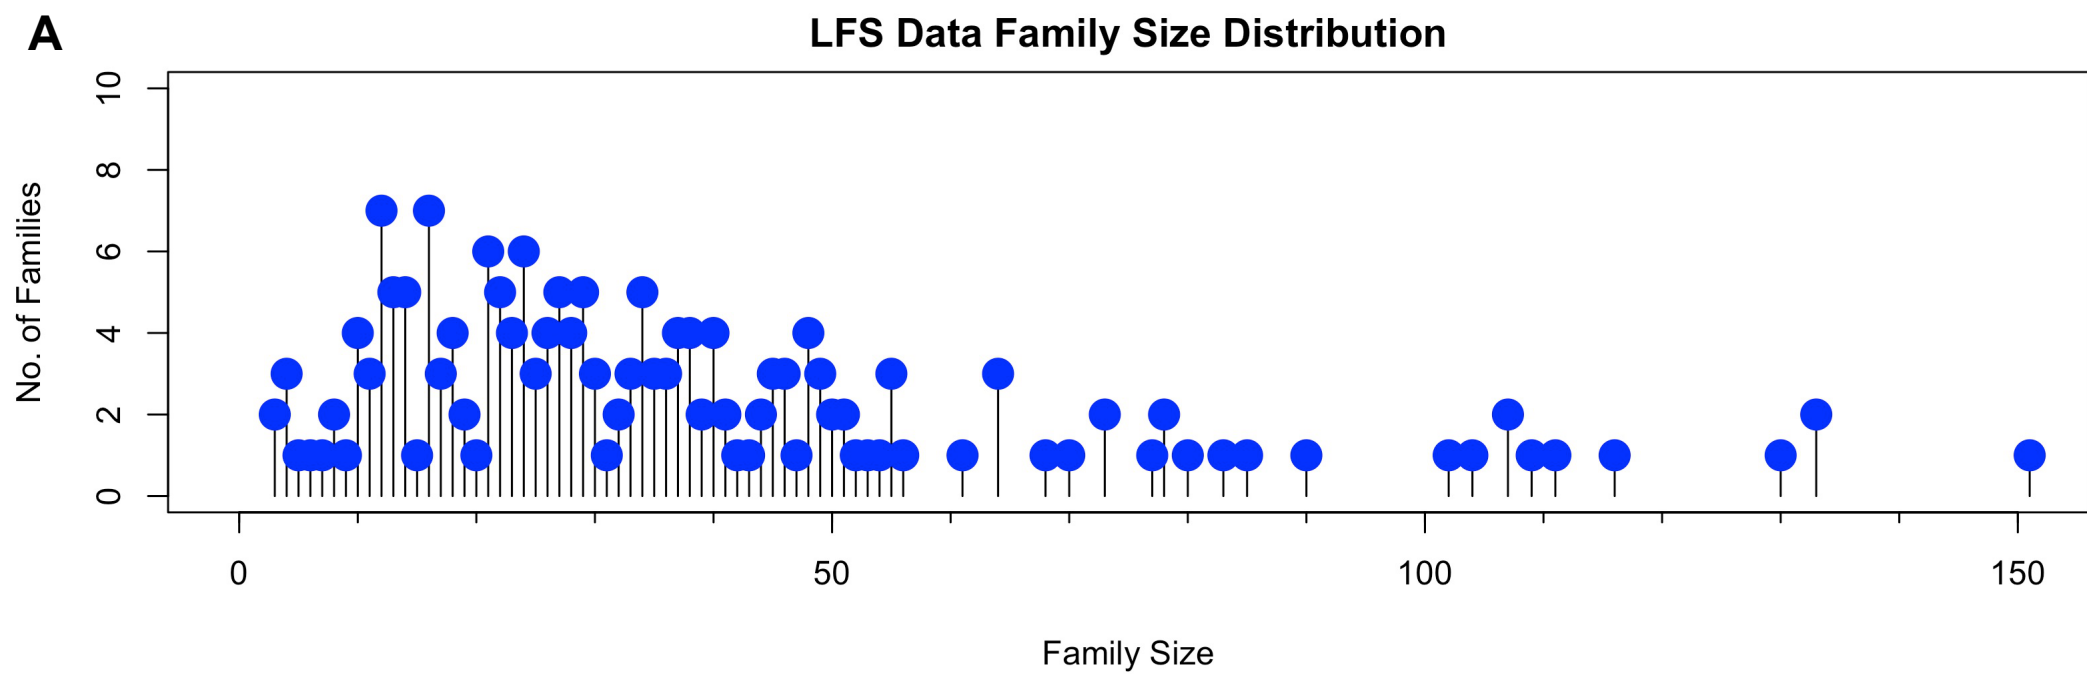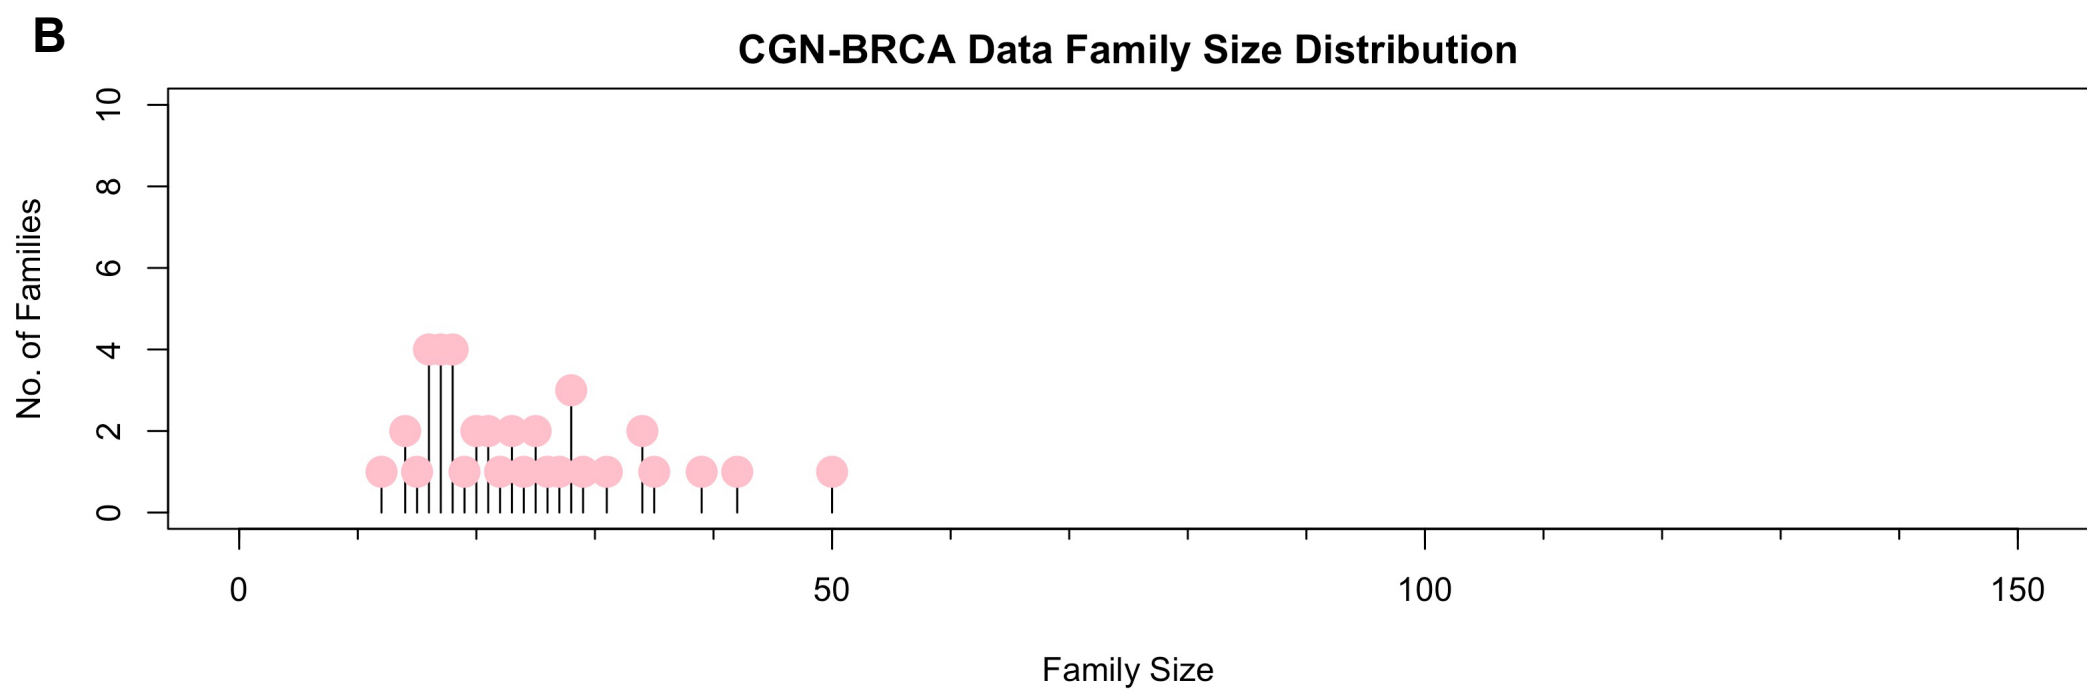

Supplement: Supplementary_Fig_S1.pdf [file Supplementary_Fig_S1.pdf]
