# Supplementary material for: A pedigree-based prediction model identifies carriers of deleterious de novo mutations in families with Li-Fraumeni syndrome
Source: HighWire-hosted journal article supplement (doi:10.1101/gr.249599.119), 2020-08-01

**Supplementary Figure 3.** Distribution of probabilities of *de novo* *BRCA1/2* mutations for 66 mutation carriers from the CGN dataset. The gray line denotes a suggested cutoff of 0.15 for the status of *de novo* mutations.

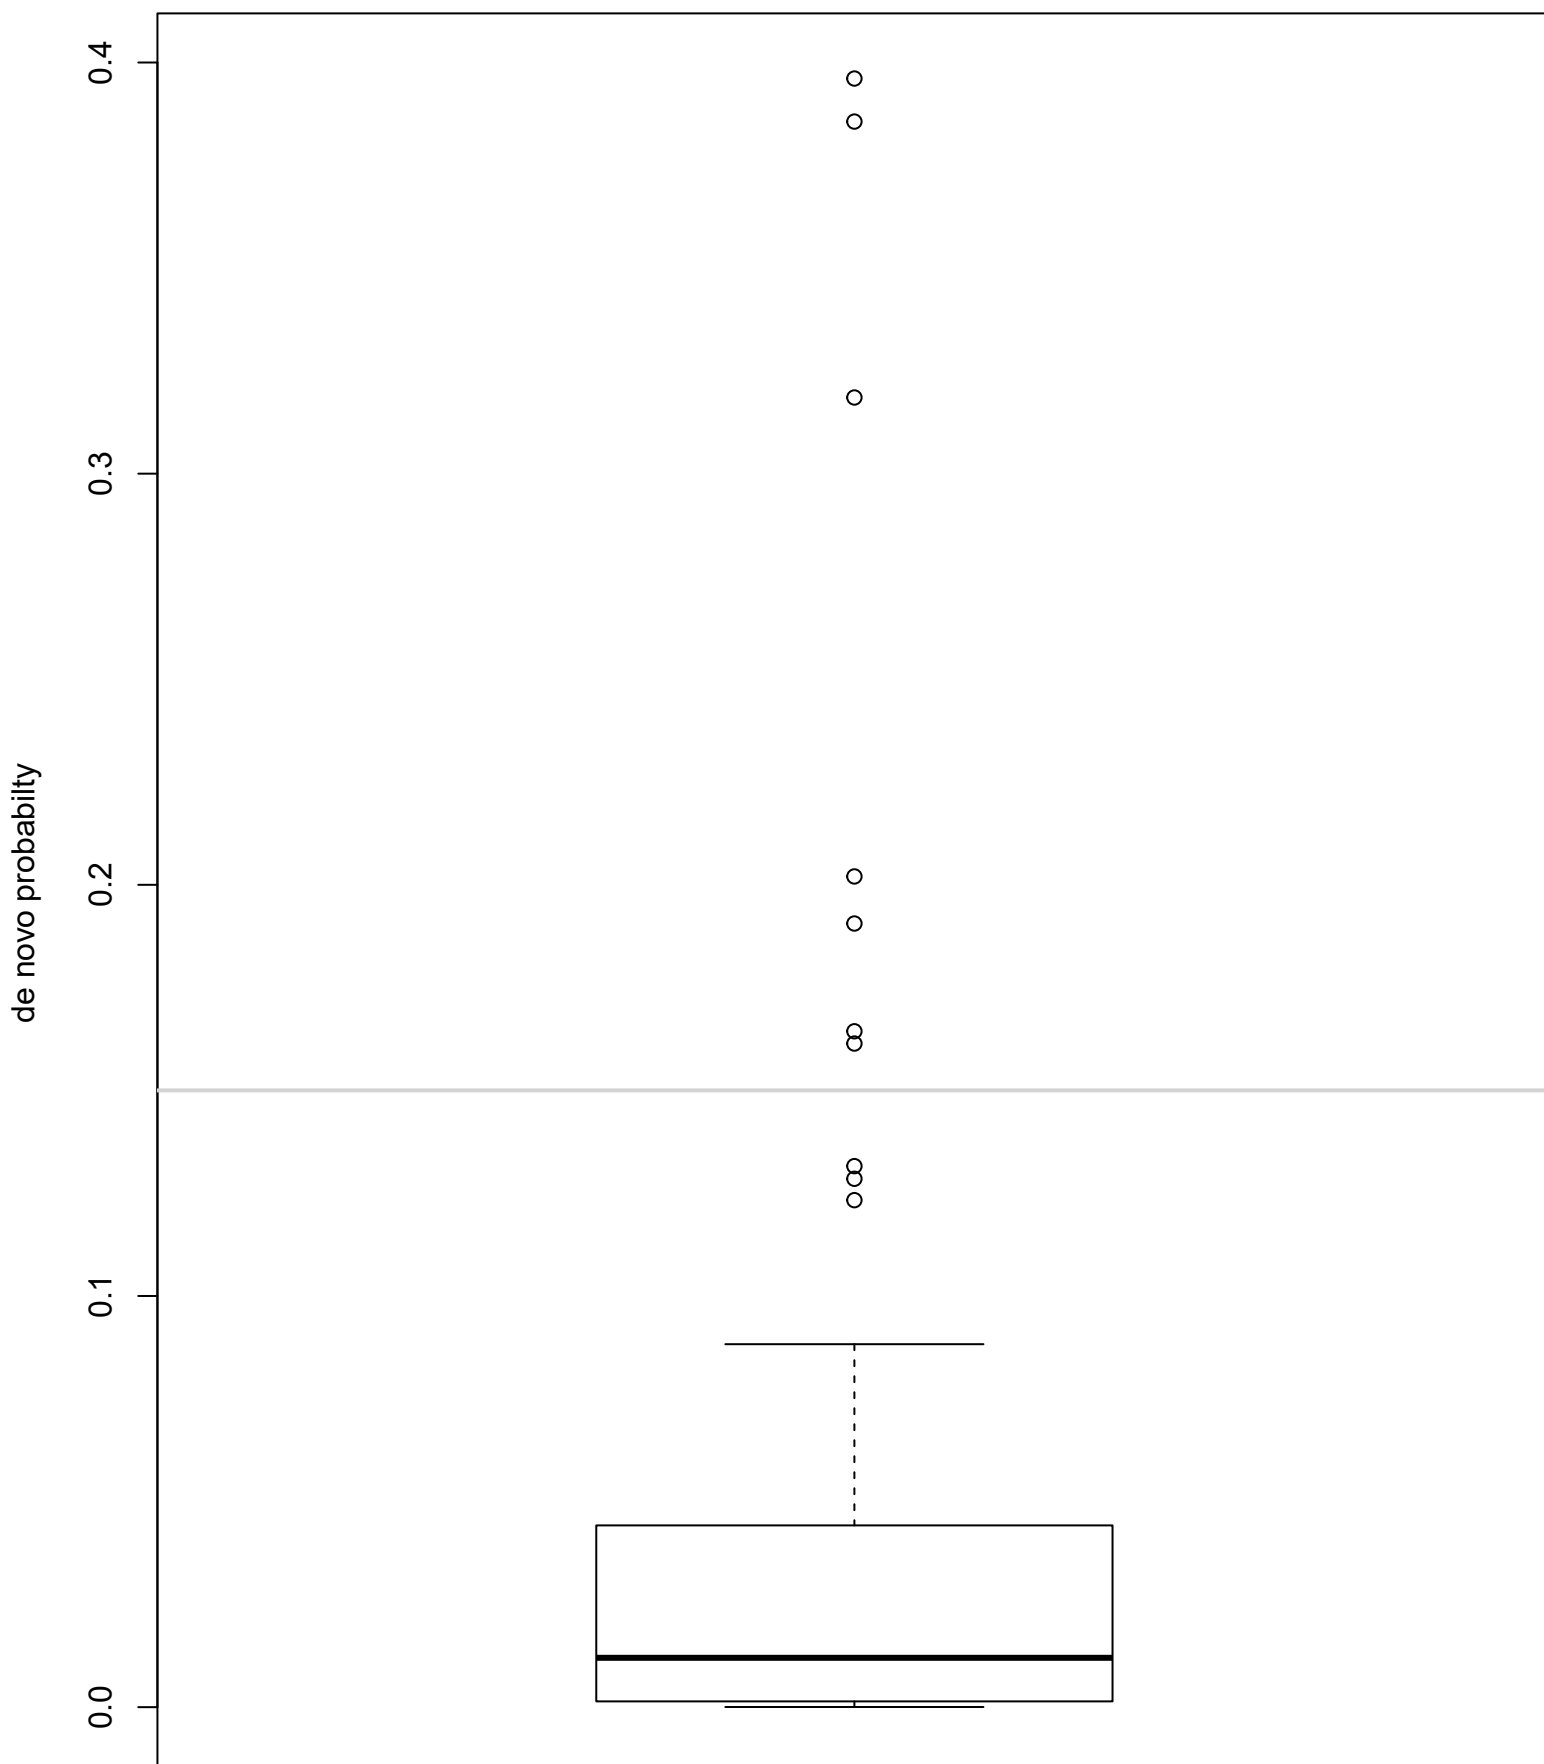

Supplement: Supplementary_Fig_S3.pdf [file Supplementary_Fig_S3.pdf]
