# Supplementary material for: A pedigree-based prediction model identifies carriers of deleterious de novo mutations in families with Li-Fraumeni syndrome
Source: HighWire-hosted journal article supplement (doi:10.1101/gr.249599.119), 2020-08-01
Supplement: Supplementary_Table_S1.xlsx [file Supplementary_Table_S1.xlsx]

## Sheet: TP53_Cohort_Mutation_Data
institution	Nu.ID	Nu.Fam	prob	truth	paternal.age	maternal.age	proband	Fam.Size	gender		Key
NCI	93	79	1.49646e-06	familial	29	24	proband	40	0		Nu.ID: ID number
NCI	94	79	6.71329e-07	familial	30	25	NA	40	1		Nu.Fam: Family number
NCI	95	79	0.000379827	familial	19	NA	NA	40	0		prob: Probability of de novo mutation
NCI	96	79	0.00115128	familial	27	NA	NA	40	0		truth: known status of de novo or familial mutation
NCI	97	79	3.79344e-06	familial	30	NA	NA	40	1		paternal.age: age of the father at child's birth
NCI	98	80	2.69777e-06	familial	21	21	proband	68	0		maternal.age: age of the mother at child's birth
NCI	99	80	1.38286e-06	familial	23	23	NA	68	0		Fam.Size: number of family members
NCI	100	80	2.02047e-06	familial	25	25	NA	68	0
NCI	101	80	2.15917e-06	familial	29	29	NA	68	0
NCI	102	80	5.20366e-06	familial	26	NA	NA	68	1
NCI	103	80	1.13976e-06	familial	28	28	NA	68	1
NCI	104	80	3.11346e-06	familial	21	21	NA	68	1
NCI	105	80	7.07799e-08	familial	38	38	NA	68	0
NCI	106	80	1.46816e-05	familial	NA	39	NA	68	1
NCI	107	80	2.01961e-05	familial	24	NA	NA	68	0
NCI	108	80	9.3509e-07	familial	NA	NA	NA	68	1
NCI	109	81	0.0113485	familial	24	25	proband	18	1
NCI	110	81	0.0109821	familial	28	29	NA	18	1
NCI	111	81	0.8015	familial	36	27	NA	18	1
NCI	112	82	0.000102599	familial	23	21	proband	16	0
NCI	113	82	9.9112e-05	familial	25	23	NA	16	1
NCI	114	82	0.0105179	familial	33	27	NA	16	1
NCI	115	83	5.70244e-06	familial	26	23	proband	40	0
NCI	116	83	5.95618e-06	familial	26	26	NA	40	1
NCI	117	83	5.86117e-06	familial	27	27	NA	40	0
NCI	118	84	0.000474762	familial	26	21	proband	130	1
NCI	119	84	0.00075322	familial	31	26	NA	130	0
NCI	120	84	1.90797e-07	familial	21	NA	NA	130	1
NCI	121	84	1.10363e-06	familial	NA	NA	NA	130	1
NCI	122	84	9.486e-07	familial	25	NA	NA	130	1
NCI	123	84	4.23692e-07	familial	29	NA	NA	130	1
NCI	124	84	5.05041e-05	familial	32	29	NA	130	1
NCI	125	84	0.0706307	familial	26	23	NA	130	1
NCI	126	84	0.000111741	familial	34	32	NA	130	1
NCI	127	84	0.000107895	familial	35	33	NA	130	0
NCI	128	84	5.0266e-05	familial	23	NA	NA	130	1
NCI	129	85	0.00212047	familial	22	21	proband	26	0
NCI	130	85	0.00239514	familial	27	26	NA	26	0
NCI	131	85	0.00152267	familial	27	NA	NA	26	0
NCI	132	85	0.0362687	familial	NA	NA	NA	26	1
NCI	133	85	0.000119381	familial	NA	30	NA	26	0
NCI	135	87	0.00987284	familial	33	31	NA	38	0
NCI	138	90	0.00292987	familial	33	33	proband	24	1
NCI	139	90	0.000305452	familial	29	29	NA	24	1
NCI	140	90	4.20184e-05	familial	29	29	NA	24	1
NCI	141	90	0.00120597	familial	31	31	NA	24	0
NCI	142	90	0.000555759	familial	37	37	NA	24	1
NCI	143	91	0.988434	denovo	26	20	proband	27	0
NCI	144	92	5.8469e-05	familial	24	19	proband	13	0
NCI	145	93	9.56944e-07	familial	30	28	proband	14	0
NCI	146	93	0.000527605	familial	33	28	NA	14	1
NCI	147	94	0.169855	familial	23	21	NA	24	0
NCI	148	95	1.08121e-06	familial	27	22	proband	12	0
NCI	149	95	7.58111e-06	familial	27	29	NA	12	0
NCI	150	96	0.00583218	familial	35	34	proband	27	1
NCI	151	96	0.000578698	familial	29	30	NA	27	1
NCI	152	96	0.00132944	familial	31	32	NA	27	0
NCI	153	97	2.82401e-05	familial	27	27	proband	27	0
NCI	154	97	3.31187e-05	familial	28	28	NA	27	0
NCI	155	97	3.86863e-05	familial	31	31	NA	27	0
NCI	156	97	1.52843e-06	familial	35	35	NA	27	1
NCI	157	97	9.54404e-06	familial	29	27	NA	27	1
NCI	158	97	9.71202e-06	familial	32	30	NA	27	1
NCI	159	97	8.14575e-06	familial	NA	27	NA	27	0
NCI	160	97	0.000353589	familial	28	28	NA	27	0
NCI	161	98	1.36844e-05	familial	29	23	proband	16	0
NCI	162	99	9.71289e-07	familial	22	21	proband	12	1
NCI	163	99	2.12954e-06	familial	24	23	NA	12	0
NCI	164	99	1.11267e-05	familial	30	30	NA	12	1
NCI	165	100	7.44729e-07	familial	35	25	proband	31	0
NCI	166	100	1.17412e-05	familial	35	25	NA	31	0
NCI	167	100	2.11298e-05	familial	NA	NA	NA	31	0
NCI	168	100	0.000309901	familial	NA	NA	NA	31	0
NCI	169	100	0.00244389	familial	33	32	NA	31	1
NCI	170	100	1.33382e-05	familial	37	36	NA	31	1
NCI	171	101	0.00011267	familial	24	18	proband	10	0
NCI	172	101	9.26618e-06	familial	25	22	NA	10	0
NCI	173	101	9.31599e-06	familial	27	24	NA	10	0
NCI	174	102	1.33917e-06	familial	26	26	proband	25	0
NCI	175	102	5.99601e-07	familial	NA	27	NA	25	0
NCI	176	102	0.0495658	familial	35	33	NA	25	1
NCI	177	102	0.00216559	familial	41	39	NA	25	0
NCI	178	102	3.42237e-07	familial	24	23	NA	25	1
NCI	179	102	3.36263e-07	familial	26	25	NA	25	0
NCI	180	102	1.00075e-05	familial	30	29	NA	25	0
NCI	181	102	3.40753e-07	familial	31	30	NA	25	0
NCI	182	103	0.999997	denovo	27	30	proband	28	0
NCI	183	104	6.03847e-05	familial	23	22	proband	50	0
NCI	184	105	5.06345e-05	familial	28	27	proband	43	0
NCI	185	106	0.0425231	familial	25	24	NA	34	0
NCI	186	107	0.0120104	familial	31	29	proband	14	0
NCI	187	107	0.00156169	familial	24	22	NA	14	0
NCI	188	107	0.000205862	familial	34	31	NA	14	1
NCI	189	107	2.05138e-05	familial	NA	30	NA	14	0
NCI	190	108	0.894918	unknown	39	34	proband	11	0
NCI	191	109	0.000276552	familial	NA	22	proband	26	0
NCI	192	110	0.313116	unknown	31	28	proband	24	0
NCI	193	111	0.456408	denovo	32	34	proband	23	0
NCI	194	112	0.000921668	familial	30	25	proband	11	1
NCI	195	112	0.00157357	familial	24	19	NA	11	0
NCI	198	115	2.53869e-06	familial	25	25	proband	12	1
NCI	199	115	7.13672e-05	familial	29	25	NA	12	1
NCI	200	115	1.4759e-05	familial	27	23	NA	12	0
NCI	201	115	0.0704441	familial	NA	NA	NA	12	0
NCI	202	116	0.000242199	familial	27	28	proband	18	0
NCI	203	116	0.0134892	familial	NA	NA	NA	18	1
NCI	204	117	1.06628e-05	familial	23	NA	proband	30	0
NCI	205	117	1.07116e-05	familial	19	NA	NA	30	1
NCI	206	118	0.014005	familial	24	20	proband	17	0
NCI	207	119	0.973988	familial	25	23	proband	21	1
NCI	208	119	1	denovo	34	25	NA	21	1
NCI	209	119	0.100587	familial	32	28	NA	21	0
NCI	210	120	0.0131858	unknown	NA	26	proband	12	0
NCI	211	121	1.97053e-05	familial	37	28	proband	11	0
NCI	212	121	2.24841e-05	familial	38	29	NA	11	0
NCI	213	121	2.23582e-05	familial	39	30	NA	11	0
NCI	214	122	0.00250683	familial	22	28	proband	33	0
NCI	215	123	0.00428068	familial	22	22	proband	16	0
NCI	216	123	0.00433088	familial	24	24	NA	16	0
NCI	217	124	3.58245e-05	familial	26	25	proband	22	0
NCI	218	124	1.96548e-05	familial	26	25	NA	22	0
NCI	219	125	0.000141303	familial	25	22	proband	25	0
NCI	220	125	1.37383e-06	familial	28	27	NA	25	0
NCI	221	125	2.21137e-05	familial	30	29	NA	25	1
NCI	222	126	0.00784748	unknown	NA	26	proband	5	0
NCI	223	127	0.0317329	unknown	24	34	proband	17	0
NCI	224	128	0.266234	unknown	NA	30	proband	14	0
NCI	225	129	0.0211962	denovo	25	23	proband	14	0
NCI	226	130	0.0104203	familial	28	23	proband	51	0
NCI	227	130	0.0112654	familial	24	25	NA	51	1
NCI	228	130	0.0201864	familial	27	23	NA	51	1
NCI	229	130	0.0266728	familial	30	26	NA	51	0
NCI	230	131	0.652381	unknown	NA	25	proband	13	0
NCI	231	132	0.0125722	familial	20	19	proband	12	0
NCI	232	133	4.26129e-05	familial	33	31	proband	18	1
NCI	233	133	0.000390633	familial	NA	NA	NA	18	1
NCI	234	133	0.000246911	familial	NA	NA	NA	18	1
NCI	235	133	0.00351233	familial	NA	NA	NA	18	1
NCI	236	134	0.000497977	familial	35	23	proband	36	1
NCI	237	134	0.0294744	familial	34	22	NA	36	1
NCI	238	134	0.000617197	familial	42	30	NA	36	1
NCI	239	134	0.0384643	familial	24	20	NA	36	0
NCI	240	134	0.00408699	familial	28	26	NA	36	0
NCI	241	134	0.000643309	familial	25	NA	NA	36	0
NCI	242	134	0.00322448	familial	22	NA	NA	36	0
NCI	243	134	2.27703e-05	familial	NA	26	NA	36	1
NCI	244	135	0.511709	denovo	35	26	proband	3	0
NCI	245	136	5.61605e-06	familial	33	30	proband	29	0
NCI	246	136	5.75639e-06	familial	36	33	NA	29	0
NCI	247	136	3.70372e-07	familial	39	36	NA	29	0
NCI	248	136	1.16097e-05	familial	36	35	NA	29	0
NCI	249	136	1.02364e-05	familial	NA	17	NA	29	0
NCI	250	137	0.00100545	familial	36	33	proband	12	1
NCI	251	138	0.00581537	familial	25	25	proband	28	0
NCI	252	138	1.73021e-05	familial	26	26	NA	28	1
NCI	253	138	0.000219731	familial	23	23	NA	28	1
NCI	254	139	1.83905e-06	familial	34	33	proband	16	0
NCI	255	139	4.58021e-05	familial	28	27	NA	16	0
NCI	256	140	0.000757504	familial	26	18	proband	21	1
NCI	257	140	0.00183305	familial	24	16	NA	21	0
NCI	258	140	6.82898e-05	familial	28	20	NA	21	1
NCI	259	141	0.142967	unknown	25	25	proband	20	0
NCI	260	142	0.00389107	familial	29	28	proband	24	1
NCI	261	142	0.000553457	familial	30	28	NA	24	0
NCI	262	143	0.746147	unknown	30	28	proband	22	0
NCI	263	144	0.00197088	familial	32	24	proband	27	0
NCI	264	145	1.03349e-06	familial	25	24	proband	33	1
NCI	265	145	1.41507e-05	familial	27	26	NA	33	1
NCI	266	145	0.0014486	familial	44	37	NA	33	0
NCI	267	146	3.20432e-06	familial	23	25	proband	19	0
NCI	268	147	0.366126	familial	28	26	proband	11	0
NCI	271	149	0.000201111	familial	25	25	proband	15	0
NCI	272	150	0.094156	unknown	34	34	proband	11	1
NCI	273	151	0.00177382	familial	27	27	proband	12	0
NCI	274	151	0.00140763	familial	21	21	NA	12	0
NCI	275	152	0.874636	denovo	29	27	proband	14	0
NCI	276	152	0.0383875	familial	35	30	NA	14	1
NCI	277	153	0.701723	unknown	24	24	proband	27	0
NCI	278	154	0.000984715	familial	20	18	proband	10	0
NCI	279	154	3.45903e-05	familial	30	29	NA	10	0
NCI	280	155	0.0192044	familial	29	27	NA	40	0
NCI	281	155	0.203563	familial	32	30	NA	40	1
NCI	282	156	0.0332644	familial	19	20	proband	22	0
NCI	283	156	5.06593e-05	familial	18	19	NA	22	0
NCI	284	156	0.00140138	familial	21	22	NA	22	0
NCI	285	156	0.000874906	familial	20	19	NA	22	0
NCI	286	157	7.33162e-05	familial	23	20	proband	29	1
NCI	287	157	0.000337968	familial	43	40	NA	29	0
NCI	288	158	0.000179716	familial	20	22	proband	21	0
NCI	289	158	0.000272142	familial	27	29	NA	21	0
NCI	290	159	0.604599	unknown	27	23	proband	16	0
NCI	291	160	2.2859e-05	familial	NA	29	proband	23	0
NCI	292	160	7.05631e-06	familial	35	31	NA	23	0
NCI	293	160	7.1506e-06	familial	37	33	NA	23	1
NCI	295	162	1.67746e-05	familial	35	29	proband	37	0
NCI	296	162	7.55443e-06	familial	38	37	NA	37	0
NCI	297	163	0.763051	denovo	25	26	proband	16	0
MDA_pros	305	170	0.000440312	unknown	27	25	proband	21	0
MDA_pros	306	171	0.00267313	familial	26	29	proband	77	0
MDA_pros	307	172	0.280884	denovo	39	30	proband	7	1
MDA_pros	308	173	0.221441	denovo	31	26	proband	5	1
MDA_pros	309	174	0.113282	familial	23	23	proband	73	0
MDA_pros	310	175	0.0422781	unknown	27	21	proband	19	1
MDA_pros	311	176	0.587324	denovo	59	37	proband	4	1
MDA_pros	312	177	3.59892e-07	unknown	NA	NA	NA	6	1
MDA_pros	313	178	1.60893e-05	familial	25	25	proband	53	1
MDA_pros	331	194	9.5271e-06	familial	34	31	NA	42	0
MDA_pros	332	195	0.323549	unknown	25	24	proband	44	0
MDA_pros	333	196	0.00196492	familial	32	31	proband	6	0
MDA_pros	334	197	0.072695	denovo	29	31	proband	16	0
MDA_pros	335	198	8.18733e-06	familial	30	27	NA	34	1
MDA_pros	336	199	1.34259e-05	familial	24	20	NA	107	0
MDA_pros	337	199	7.32755e-07	familial	NA	23	NA	107	1
MDA_pros	338	200	0.000103154	familial	28	23	NA	49	1
MDA_pros	339	201	0.0101857	unknown	25	22	proband	125	0
MDA_pros	340	202	0.980756	denovo	32	29	proband	35	0
MDA_pros	341	203	0.0492144	unknown	31	28	proband	48	0
MDA_pros	342	204	0.0276118	familial	37	29	NA	49	1
MDA_pros	343	205	0.000186207	unknown	38	29	proband	114	0
MDA_pros	344	205	0.000164116	unknown	37	28	NA	114	0
MDA_pros	345	205	0.000185158	unknown	39	30	NA	114	0
MDA_pros	346	206	4.81195e-06	familial	29	28	NA	133	0
MDA_pros	347	207	1.11376e-05	familial	25	21	NA	83	1
MDA_pros	348	208	1.19737e-05	unknown	36	37	NA	40	0
MDA_pros	349	208	5.00085e-06	unknown	26	27	NA	40	0
MDA_pros	350	209	3.10879e-05	familial	38	34	proband	39	0
MDA_pros	351	210	0.0037163	unknown	32	27	proband	45	0
MDA_pros	352	210	0.0016204	unknown	30	25	NA	45	1
MDA_pros	353	211	1.32688e-06	unknown	39	37	proband	67	0
MDA_pros	354	211	1.00102e-06	unknown	31	29	NA	67	1
MDA_pros	355	211	4.00387e-09	unknown	34	31	NA	67	0
MDA_pros	356	211	5.54505e-06	unknown	28	25	NA	67	0
MDA_pros	357	212	1.94325e-05	unknown	33	20	proband	79	0
MDA_pros	358	212	1.591e-06	unknown	25	19	NA	79	0
MDA_pros	359	213	0.819718	familial	23	22	proband	55	0
MDA_pros	360	213	0.162508	familial	27	26	NA	55	0
MDA_pros	361	214	4.90538e-07	familial	41	28	proband	133	1
MDA_pros	362	215	0.398416	denovo	18	17	proband	41	0
MDA_pros	363	215	0.0164254	familial	18	22	NA	41	1
MDA_pros	364	216	0.921721	familial	25	21	proband	48	0
MDA_pros	365	216	0.289449	familial	28	24	NA	48	0
MDA_pros	366	217	2.7395e-05	familial	30	29	proband	23	0
MDA_pros	367	218	0.0350552	familial	36	29	proband	46	0
MDA_pros	368	219	1.11954e-07	unknown	NA	22	NA	27	0
MDA_pros	369	220	0.00033104	unknown	25	26	proband	25	0
MDA_pros	370	220	0.000362759	unknown	35	25	NA	25	0
MDA_pros	371	221	0.0343151	familial	29	25	proband	29	1
MDA_pros	372	222	0.0118765	denovo	31	31	proband	49	0
MDA_pros	373	222	0.000765475	familial	27	30	NA	49	0
MDA_pros	374	222	0.000771697	familial	30	33	NA	49	0
MDA_pros	375	223	9.48596e-06	unknown	36	33	proband	71	1
MDA_pros	376	223	7.05935e-06	unknown	24	23	NA	71	0
MDA_pros	377	224	1.05759e-05	unknown	19	20	proband	41	1
MDA_pros	378	224	0.000325944	unknown	28	21	NA	41	1
MDA_pros	379	224	0.000326673	unknown	30	23	NA	41	1
MDA_pros	380	224	1.46544e-05	unknown	28	27	NA	41	1
MDA_pros	381	224	1.16051e-06	unknown	26	25	NA	41	1
MDA_pros	382	225	0.00623084	unknown	28	28	proband	15	0
MDA_pros	383	225	0.00547895	unknown	26	26	NA	15	0
MDA_pros	384	226	5.85406e-06	familial	23	20	NA	37	0
MDA_pros	385	226	5.99547e-06	familial	32	29	NA	37	0
MDA_pros	386	227	0.000675288	familial	22	21	NA	73	1
MDA_pros	387	227	5.44083e-05	familial	31	31	NA	73	1
MDA_pros	388	228	0.274595	familial	40	28	proband	17	0
MDA_pros	389	228	0.0165875	familial	38	26	NA	17	1
MDA_pros	390	228	0.0138683	familial	32	30	NA	17	1
MDA_pros	391	229	8.29481e-06	familial	30	29	NA	80	1
MDA_pros	392	229	8.32269e-06	familial	33	32	NA	80	1
MDA_pros	393	230	0.00358225	unknown	35	29	proband	34	1
MDA_pros	394	231	0.053396	familial	29	28	proband	52	0
MDA_pros	395	231	4.75988e-06	familial	NA	29	NA	52	0
MDA_pros	396	232	0.0276073	familial	28	24	proband	4	0
MDA_pros	397	232	0.0124314	familial	30	26	NA	4	1
MDA_pros	398	233	0.00817638	unknown	25	27	proband	19	0
MDA_pros	399	234	0.712767	unknown	39	32	proband	34	0
MDA_pros	400	235	0.401939	denovo	34	28	proband	21	0
MDA_pros	401	236	0.0893856	denovo	25	20	proband	50	0
MDA_pros	402	237	0.000582234	familial	NA	32	NA	44	1
MDA_pros	403	238	0.438457	unknown	26	26	proband	39	0
MDA_pros	404	239	0.815157	unknown	31	32	proband	34	0
MDA_pros	405	240	0.370878	unknown	35	33	proband	25	0
MDA_pros	406	241	0.0169834	unknown	31	30	proband	39	0
MDA_pros	407	242	0.0183785	familial	33	40	NA	24	1
MDA_pros	408	243	0.877184	unknown	30	29	proband	18	0
MDA_pros	409	244	0.0499307	denovo	34	30	proband	13	0
MDA_pros	410	245	1.0434e-05	familial	25	18	NA	85	1
MDA_pros	411	245	0.000312835	familial	31	27	NA	85	1
MDA_pros	412	246	0.816134	denovo	27	24	proband	61	0
MDA_pros	413	246	0.0350406	familial	24	24	NA	61	1
MDA_pros	414	247	1.1119e-05	familial	36	35	proband	33	1
MDA_pros	415	247	7.67025e-06	familial	23	22	NA	33	0
MDA_pros	416	247	5.68339e-07	familial	25	24	NA	33	0
MDA_pros	417	248	1.19893e-05	familial	26	25	NA	34	1
MDA_pros	418	249	0.0961488	unknown	26	18	proband	70	0
MDA_pros	419	250	0.00116097	familial	26	21	proband	78	0
MDA_pros	420	250	0.00108507	familial	37	27	NA	78	0
MDA_pros	421	250	0.637917	denovo	26	23	NA	78	0
MDA_pros	422	251	0.62007	unknown	31	22	proband	14	1
MDA_pros	423	252	0.00428145	familial	24	21	proband	35	0
MDA_pros	424	252	0.00426438	familial	22	19	NA	35	0
MDA_pros	425	253	0.0828125	unknown	24	22	proband	33	0
MDA_pros	426	254	0.000855085	familial	36	29	proband	40	0
MDA_pros	427	254	0.000798662	familial	29	22	NA	40	0
MDA_pros	428	254	2.90115e-05	familial	31	24	NA	40	1
MDA_pros	429	255	0.0388283	familial	36	32	NA	29	0
MDA_pros	430	256	0.00691682	unknown	17	17	proband	60	1
MDA_pros	431	257	0.725467	denovo	32	34	proband	26	1
MDA_pros	432	258	9.5918e-07	familial	21	20	NA	116	0
MDA_pros	433	258	1.42104e-05	familial	29	28	NA	116	1
MDA_pros	434	258	7.53693e-06	familial	17	20	NA	116	1
MDA_pros	435	258	5.68272e-07	familial	22	23	NA	116	0
MDA_pros	436	258	6.2886e-07	familial	24	25	NA	116	1
MDA_pros	437	258	1.56218e-07	familial	18	23	NA	116	1
MDA_pros	438	258	4.43874e-06	familial	23	28	NA	116	0
MDA_pros	439	258	1.01312e-06	familial	33	32	NA	116	0
MDA_pros	440	258	1.18815e-05	familial	24	22	NA	116	1
MDA_pros	441	258	1.18303e-05	familial	25	23	NA	116	0
MDA_pros	442	259	0.00026039	familial	31	24	proband	151	1
MDA_pros	443	259	1.95268e-05	familial	32	25	NA	151	1
MDA_pros	444	260	1.06187e-06	familial	21	21	proband	64	1
MDA_pros	445	260	7.98172e-08	familial	27	27	NA	64	0
MDA_pros	446	260	1.03249e-06	familial	29	29	NA	64	1
MDA_pros	447	260	8.44071e-08	familial	34	34	NA	64	0
MDA_pros	448	260	8.60991e-08	familial	35	35	NA	64	1
MDA_pros	449	261	2.20339e-06	familial	26	26	proband	109	1
MDA_pros	450	261	5.03362e-06	familial	33	33	NA	109	0
MDA_pros	451	261	1.72846e-07	familial	36	36	NA	109	1
MDA_pros	452	262	0.00207736	unknown	31	29	proband	43	1
MDA_pros	453	263	0.095125	denovo	29	28	proband	54	1
MDA_pros	454	264	0.00843647	unknown	27	24	proband	15	1
MDA_pros	455	265	1.04219e-05	unknown	30	24	proband	32	1
MDA_pros	456	266	0.959629	denovo	31	26	proband	22	1
MDA_pros	457	267	0.868951	unknown	29	29	proband	111	0
MDA_pros	458	268	0.363791	unknown	29	23	proband	21	1
MDA_pros	459	269	0.041187	familial	26	24	proband	10	0
MDA_pros	460	270	0.197663	unknown	21	17	proband	45	0
MDA_pros	461	271	0.981733	unknown	27	25	proband	63	0
MDA_pros	462	272	0.0143042	unknown	41	37	proband	20	1
MDA_pros	463	273	1.93685e-05	familial	30	30	NA	70	0
MDA_pros	464	274	0.969642	denovo	25	22	proband	47	0
MDA_pros	465	275	0.864308	denovo	24	26	proband	28	0
MDA_pros	466	276	0.000874824	unknown	25	25	proband	13	0
MDA_pros	467	276	0.000654998	unknown	20	20	NA	13	0
MDA_pros	468	277	0.880449	denovo	31	28	proband	24	0
MDA_pros	469	278	0.000655774	unknown	33	28	proband	51	0
MDA_pros	470	279	0.999995	denovo	25	25	proband	13	1
MDA_pros	471	279	0.00377408	familial	36	32	NA	13	1
MDA_pros	472	279	0.100231	familial	38	34	NA	13	0
MDA_pros	473	280	0.917885	denovo	33	28	proband	55	0
MDA_pros	474	281	0.00065746	unknown	31	29	proband	28	0
MDA_pros	475	281	0.00079743	unknown	39	37	NA	28	0
MDA_pros	476	282	4.27542e-05	unknown	29	28	proband	46	0
MDA_pros	477	283	0.0026309	familial	24	22	NA	90	0
MDA_pros	478	283	0.00294168	familial	30	28	NA	90	1
MDA_pros	479	283	0.00294168	familial	30	28	NA	90	1
MDA_pros	480	284	0.99807	familial	33	28	proband	46	0
MDA_pros	481	284	0.997518	familial	27	22	NA	46	0
MDA_pros	482	285	0.433956	familial	30	22	proband	8	0
MDA_pros	483	285	0.0260322	familial	43	35	NA	8	1
MDA_pros	484	286	0.948455	unknown	25	26	proband	29	0
MDA_pros	485	287	0.868722	unknown	30	29	proband	27	0
MDA_pros	486	288	0.811696	unknown	25	24	proband	27	0
MDA_pros	487	289	0.999995	denovo	27	24	proband	34	0
MDA_pros	488	290	0.904953	unknown	18	17	proband	38	0
MDA_pros	489	291	0.655784	unknown	23	22	proband	53	0
MDA_pros	490	292	0.469171	unknown	31	30	proband	36	1
MDA_pros	491	293	0.605034	unknown	20	18	proband	25	0
MDA_pros	492	294	0.168727	unknown	26	22	proband	20	0
MDA_pros	493	295	0.00759755	familial	22	19	NA	28	1
MDA_pros	494	295	0.00750001	familial	22	22	NA	28	0
MDA_pros	495	296	0.925382	unknown	34	29	proband	51	0
MDA_pros	496	297	0.568433	unknown	30	25	proband	11	1
MDA_pros	497	298	0.776212	denovo	24	21	proband	20	0
MDA_pros	498	299	0.355408	denovo	21	24	proband	41	0
MDA_pros	499	300	0.000751868	familial	19	19	proband	78	0
MDA_pros	500	300	0.000372165	familial	25	25	NA	78	0
MDA_pros	501	301	2.35282e-06	unknown	38	34	proband	23	0
MDA_pros	502	301	1.41374e-06	unknown	31	27	NA	23	0
MDA_pros	503	302	0.824847	denovo	20	20	proband	30	0
MDA_pros	504	303	0.00242367	unknown	39	26	proband	129	0
MDA_pros	505	304	0.00175805	unknown	23	23	proband	88	0
MDA_pros	506	304	0.00131438	unknown	27	35	NA	88	0
MDA_pros	507	305	0.713878	unknown	25	24	proband	14	0
MDA_pros	508	306	0.999079	denovo	32	30	proband	64	0
MDA_pros	509	307	0.909117	unknown	30	30	proband	40	1
MDA_pros	510	308	1.91996e-05	unknown	42	40	proband	50	1
MDA_pros	511	309	0.741009	denovo	34	39	proband	25	1
MDA_pros	512	310	0.0371095	denovo	39	32	proband	38	0
MDA_pros	513	311	0.00203439	familial	35	33	proband	13	0
MDA_pros	514	312	0.0995009	familial	27	33	proband	56	1
MDA_pros	515	313	0.52772	unknown	23	32	proband	19	0
MDA_pros	516	314	2.05769e-07	familial	24	23	NA	29	0
MDA_pros	517	314	6.04921e-06	familial	26	25	NA	29	0
MDA_pros	518	315	2.22921e-05	familial	22	22	NA	38	1
MDA_pros	519	316	0.000595999	familial	23	24	proband	39	0
MDA_pros	520	317	0.000108087	familial	30	29	NA	21	1
MDA_pros	521	317	0.000228837	familial	32	31	NA	21	0
MDA_pros	522	317	0.000103596	familial	37	36	NA	21	1
MDA_pros	523	317	8.41183e-06	familial	44	43	NA	21	1
MDA_pros	524	318	6.1445e-05	familial	31	25	NA	111	1
MDA_pros	525	319	0.017917	familial	43	36	proband	45	0
MDA_pros	526	320	4.37952e-07	familial	41	34	proband	102	0
MDA_pros	527	320	3.67493e-07	familial	19	21	NA	102	1
MDA_pros	528	320	1.20149e-05	familial	33	35	NA	102	0
MDA_pros	529	321	0.125504	denovo	35	35	proband	12	1
MDA_pros	530	322	0.431634	unknown	28	26	proband	23	1
MDA_pros	531	323	0.00274583	familial	26	27	NA	36	0
MDA_pros	532	324	0.00281822	familial	20	19	NA	104	1
DFCI	1	1	8.82502e-08	unknown	24	23	proband	46	1
DFCI	2	2	1.41933e-06	familial	NA	NA	NA	8	1
DFCI	3	3	3.19197e-06	unknown	29	NA	proband	63	0
DFCI	4	4	3.24556e-10	unknown	NA	32	NA	76	0
DFCI	5	4	3.40787e-06	unknown	22	NA	NA	76	0
DFCI	6	5	0.157961	unknown	NA	NA	NA	24	1
DFCI	7	6	0.000419523	familial	24	26	NA	107	0
DFCI	8	7	0.000509559	unknown	35	NA	NA	12	0
DFCI	9	8	8.26158e-06	familial	NA	30	NA	26	1
DFCI	10	9	5.7726e-07	familial	NA	27	NA	48	0
DFCI	11	10	7.1145e-06	familial	NA	NA	NA	45	1
DFCI	12	11	0.00172942	unknown	32	NA	proband	14	0
DFCI	13	12	0.000316213	familial	27	NA	NA	38	1
DFCI	14	12	0.000318268	familial	24	NA	NA	38	1
DFCI	15	13	7.65323e-06	unknown	NA	NA	NA	30	0
DFCI	16	14	0.00119367	unknown	NA	NA	proband	5	0
DFCI	17	15	2.00436e-07	unknown	31	34	NA	40	0
DFCI	18	16	1.64336e-05	familial	23	NA	NA	48	1
DFCI	19	16	6.13053e-08	familial	NA	23	NA	48	0
DFCI	20	16	4.48889e-07	familial	NA	21	NA	48	1
DFCI	21	16	1.22413e-05	familial	22	NA	NA	48	1
DFCI	22	17	3.56542e-06	unknown	NA	22	NA	24	0
DFCI	23	18	0.0285364	unknown	NA	NA	NA	18	1
DFCI	24	19	6.233e-08	familial	32	NA	NA	16	1
DFCI	25	20	0.000225455	unknown	NA	NA	NA	19	1
DFCI	26	21	0.000874737	familial	22	NA	NA	27	1
DFCI	27	22	1.06652e-06	unknown	NA	NA	NA	20	0
DFCI	28	23	2.32244e-06	familial	NA	NA	NA	55	0
DFCI	29	24	1.32856e-05	familial	NA	NA	NA	9	1
DFCI	30	25	0.00181729	unknown	NA	NA	proband	12	0
DFCI	31	26	2.17968e-07	unknown	31	NA	NA	17	0
DFCI	32	27	8.789e-06	familial	NA	25	NA	32	1
DFCI	33	28	0.000418948	unknown	NA	NA	proband	57	0
DFCI	34	28	4.2341e-05	unknown	NA	NA	NA	57	0
DFCI	35	28	0.000110379	unknown	NA	NA	NA	57	1
DFCI	36	29	0.000121317	unknown	NA	NA	proband	19	0
DFCI	37	29	7.47461e-05	unknown	NA	NA	NA	19	1
DFCI	38	30	2.25014e-05	familial	NA	23	proband	10	0
DFCI	39	31	0.000948257	unknown	NA	20	NA	170	0
DFCI	40	31	0.00805456	unknown	NA	22	NA	170	0
DFCI	41	32	3.96544e-06	familial	28	NA	proband	3	0
DFCI	42	33	0.0429366	unknown	NA	NA	NA	19	0
DFCI	43	34	0.000196792	unknown	NA	NA	proband	6	0
DFCI	44	35	0.00339493	unknown	NA	NA	proband	10	1
DFCI	45	36	0.0102016	unknown	NA	NA	proband	4	0
DFCI	46	37	0.00101369	unknown	NA	NA	proband	25	0
DFCI	47	38	0.00117884	unknown	NA	NA	proband	35	0
DFCI	48	39	0.000205672	unknown	NA	NA	proband	32	1
DFCI	49	40	0.918123	unknown	NA	NA	NA	47	0
DFCI	50	41	0.0196533	familial	29	29	NA	48	0
DFCI	51	42	0.000734248	familial	36	NA	proband	14	0
DFCI	52	43	0.00010568	unknown	35	25	proband	28	0
DFCI	53	44	7.59082e-06	unknown	NA	21	proband	19	1
DFCI	54	45	0.000774254	familial	NA	26	proband	24	1
DFCI	55	46	0.000359751	familial	NA	35	NA	44	0
DFCI	56	47	1.44017e-06	familial	28	NA	NA	37	0
DFCI	57	48	0.0114944	familial	NA	NA	NA	4	1
DFCI	58	49	5.79448e-05	familial	NA	NA	NA	37	0
DFCI	59	50	0.0342706	unknown	NA	NA	proband	28	0
DFCI	60	51	0.0183667	unknown	NA	28	proband	18	0
DFCI	61	52	0.0399646	familial	30	32	proband	46	0
DFCI	62	53	0.017537	familial	NA	37	NA	51	1
DFCI	63	53	0.00152677	familial	22	NA	NA	51	1
DFCI	64	54	1.28024e-07	unknown	NA	NA	proband	43	0
DFCI	65	54	4.68915e-07	unknown	NA	NA	NA	43	0
DFCI	66	55	2.60493e-05	unknown	35	31	proband	26	1
DFCI	67	56	0.0726187	familial	34	30	proband	19	0
DFCI	68	57	0.993297	unknown	33	29	proband	38	0
DFCI	69	58	3.24e-06	unknown	36	24	NA	43	1
DFCI	70	59	0.000150597	unknown	25	23	NA	55	0
DFCI	71	60	5.3365e-06	unknown	NA	22	proband	50	0
DFCI	72	61	0.000644337	unknown	25	NA	NA	37	0
DFCI	73	62	0.0188761	unknown	NA	NA	proband	22	0
DFCI	74	63	1.86339e-05	unknown	NA	24	proband	28	1
DFCI	75	64	2.06557e-06	unknown	NA	22	proband	88	1
DFCI	76	65	0.000491485	unknown	25	19	proband	50	0
DFCI	77	65	1.97434e-05	unknown	29	23	NA	50	0
DFCI	78	66	0.738459	familial	39	29	proband	22	1
DFCI	79	67	0.00115699	unknown	NA	27	proband	32	1
DFCI	80	68	0.934917	unknown	30	21	proband	55	0
DFCI	81	69	0.00199038	unknown	NA	NA	proband	19	0
DFCI	82	70	2.69727e-05	familial	33	31	NA	64	1
DFCI	83	70	2.70631e-05	familial	36	34	NA	64	1
DFCI	84	71	0.000202087	unknown	NA	19	proband	27	0
DFCI	85	72	0.268037	familial	23	25	proband	17	1
DFCI	86	73	0.811443	unknown	39	37	proband	23	0
DFCI	87	74	5.78811e-06	unknown	26	NA	proband	41	0
DFCI	88	75	5.14077e-11	unknown	NA	23	proband	48	1
DFCI	89	75	3.91225e-12	unknown	NA	20	NA	48	1
DFCI	90	76	0.00122905	unknown	28	NA	proband	14	1
DFCI	91	77	0.00107089	unknown	17	NA	proband	22	1
DFCI	92	78	0.719816	denovo	35	37	proband	23	0
DFCI	134	86	0.00265711	unknown	38	31	proband	126	1
DFCI	136	88	1	denovo	34	29	proband	34	0
DFCI	137	89	0.0600346	unknown	24	21	proband	25	0
DFCI	196	113	3.59892e-07	unknown	NA	NA	proband	4	1
DFCI	197	114	0.0880017	familial	39	38	proband	35	1
DFCI	269	148	0.0504716	unknown	32	30	NA	45	1
DFCI	270	148	0.110928	unknown	35	33	NA	45	0
DFCI	294	161	1.90789e-05	unknown	22	NA	proband	38	0
DFCI	298	164	0.982682	unknown	28	24	proband	36	1
DFCI	299	165	0.0112664	unknown	32	31	proband	23	0
DFCI	300	166	0.773029	unknown	31	28	proband	25	0
DFCI	301	167	0.98068	unknown	32	35	proband	25	0
DFCI	302	168	0.00132226	unknown	23	24	NA	49	1
DFCI	303	168	0.00133734	unknown	34	33	NA	49	1
DFCI	304	169	7.30688e-05	unknown	NA	NA	proband	28	0
CHOP	314	179	0.364903	unknown	25	24	proband	24	1
CHOP	315	180	0.609407	unknown	30	26	proband	44	0
CHOP	316	181	0.00200214	familial	27	26	proband	36	0
CHOP	317	181	0.00202361	familial	31	30	NA	36	0
CHOP	318	182	0.869697	denovo	29	29	proband	32	1
CHOP	319	183	0.0836324	unknown	38	35	proband	34	1
CHOP	320	184	0.306305	denovo	36	34	proband	18	0
CHOP	321	185	0.00412318	familial	45	35	proband	22	1
CHOP	322	186	0.0628036	denovo	31	31	proband	21	0
CHOP	323	187	0.0356008	denovo	31	30	proband	30	1
CHOP	324	188	0.000903337	familial	25	25	proband	13	0
CHOP	325	189	0.114425	unknown	28	26	proband	19	0
CHOP	326	190	0.00933796	unknown	17	15	proband	30	0
CHOP	327	191	0.00270689	unknown	29	27	proband	12	0
CHOP	328	191	0.000100228	unknown	34	32	NA	12	1
CHOP	329	192	0.0125714	familial	30	28	proband	45	0
CHOP	330	193	0.222467	unknown	20	20	proband	4	0

## Sheet: TP53_Cohort_Cancer_Data
institution	Nu.ID	Nu.Fam	cancer.first	diag.age.first		Key
DFCI	1	1	non.lfs	44		Nu.ID: ID number
DFCI	2	2	non.lfs	1		Nu.Fam: Family number
DFCI	3	3	ost	15		cancer.first: first primary cancer diagnosed
DFCI	4	4	breast	34		diag.age.first: age at diagnosis of the first primary cancer
DFCI	5	4	breast	36
DFCI	6	5	non.lfs	41
DFCI	8	7	breast	33
DFCI	9	8	brain	4
DFCI	10	9	sts	3
DFCI	11	10	leukemia	26
DFCI	12	11	ost	19
DFCI	13	12	ost	5
DFCI	14	12	sts	4
DFCI	15	13	breast	29
DFCI	16	14	leukemia	19
DFCI	17	15	breast	36
DFCI	18	16	sts	1
DFCI	19	16	breast	33
DFCI	20	16	brain	32
DFCI	21	16	brain	10
DFCI	22	17	breast	38
DFCI	23	18	sts	50
DFCI	24	19	leukemia	26
DFCI	25	20	ost	15
DFCI	26	21	ost	14
DFCI	27	22	breast	24
DFCI	28	23	ost	17
DFCI	29	24	ost	7
DFCI	30	25	acc	1
DFCI	31	26	breast	35
DFCI	32	27	sts	2
DFCI	33	28	acc	2
DFCI	34	28	breast	48
DFCI	36	29	non.lfs	32
DFCI	37	29	lung	31
DFCI	38	30	breast	24
DFCI	39	31	breast	52
DFCI	40	31	breast	60
DFCI	41	32	acc	1
DFCI	42	33	sts	16
DFCI	43	34	breast	29
DFCI	44	35	brain	9
DFCI	45	36	breast	21
DFCI	46	37	breast	21
DFCI	47	38	ost	12
DFCI	48	39	brain	55
DFCI	49	40	breast	29
DFCI	50	41	brain	1
DFCI	51	42	brain	1
DFCI	52	43	breast	29
DFCI	53	44	brain	10
DFCI	54	45	brain	7
DFCI	56	47	breast	28
DFCI	57	48	ost	3
DFCI	58	49	acc	4
DFCI	59	50	breast	28
DFCI	60	51	non.lfs	31
DFCI	61	52	acc	1
DFCI	63	53	choroid	0
DFCI	64	54	non.lfs	55
DFCI	65	54	breast	43
DFCI	66	55	non.lfs	35
DFCI	67	56	sts	31
DFCI	68	57	breast	33
DFCI	69	58	sts	35
DFCI	71	60	breast	24
DFCI	72	61	non.lfs	68
DFCI	73	62	breast	29
DFCI	76	65	breast	29
DFCI	79	67	sts	38
DFCI	80	68	breast	24
DFCI	81	69	breast	32
DFCI	84	71	breast	40
DFCI	85	72	sts	3
DFCI	86	73	breast	22
DFCI	88	75	ost	46
DFCI	89	75	non.lfs	55
DFCI	90	76	ost	16
DFCI	92	78	choroid	3
NCI	93	79	ost	11
NCI	94	79	ost	14
NCI	95	79	breast	19
NCI	96	79	non.lfs	27
NCI	98	80	sts	24
NCI	99	80	breast	44
NCI	102	80	non.lfs	47
NCI	103	80	sts	50
NCI	104	80	non.lfs	46
NCI	105	80	breast	47
NCI	107	80	brain	26
NCI	109	81	sts	5
NCI	110	81	ost	6
NCI	111	81	sts	40
NCI	112	82	sts	41
NCI	113	82	non.lfs	45
NCI	114	82	ost	23
NCI	115	83	breast	25
NCI	118	84	non.lfs	51
NCI	119	84	breast	43
NCI	120	84	leukemia	62
NCI	122	84	ost	18
NCI	123	84	non.lfs	51
NCI	125	84	brain	46
NCI	129	85	sts	30
NCI	130	85	breast	26
NCI	131	85	breast	34
DFCI	134	86	acc	3
NCI	135	87	sts	24
DFCI	136	88	breast	44
DFCI	137	89	breast	21
NCI	139	90	non.lfs	52
NCI	141	90	ost	15
NCI	142	90	ost	10
NCI	143	91	ost	24
NCI	144	92	breast	34
NCI	145	93	sts	25
NCI	146	93	sts	41
NCI	147	94	sts	36
NCI	148	95	breast	29
NCI	149	95	breast	29
NCI	151	96	sts	3
NCI	152	96	choroid	1
NCI	153	97	breast	33
NCI	154	97	breast	30
NCI	155	97	sts	25
NCI	161	98	breast	39
NCI	162	99	brain	22
NCI	163	99	brain	20
NCI	166	100	breast	43
NCI	169	100	brain	55
NCI	170	100	non.lfs	70
NCI	171	101	sts	18
NCI	174	102	sts	36
NCI	176	102	brain	43
NCI	177	102	breast	33
NCI	180	102	acc	4
NCI	182	103	breast	36
NCI	183	104	breast	22
NCI	184	105	leukemia	19
NCI	185	106	sts	28
NCI	186	107	breast	33
NCI	187	107	leukemia	14
NCI	188	107	non.lfs	0
NCI	190	108	brain	18
NCI	191	109	breast	25
NCI	192	110	sts	3
NCI	193	111	breast	23
NCI	194	112	sts	24
NCI	195	112	breast	30
DFCI	197	114	sts	2
NCI	199	115	sts	45
NCI	200	115	breast	35
NCI	201	115	sts	20
NCI	203	116	non.lfs	58
NCI	206	118	non.lfs	22
NCI	207	119	non.lfs	40
NCI	210	120	leukemia	13
NCI	211	121	breast	20
NCI	212	121	ost	12
NCI	213	121	sts	13
NCI	214	122	non.lfs	31
NCI	215	123	breast	26
NCI	216	123	ost	28
NCI	217	124	acc	2
NCI	218	124	breast	34
NCI	219	125	breast	35
NCI	221	125	ost	8
NCI	222	126	non.lfs	35
NCI	223	127	sts	2
NCI	224	128	sts	25
NCI	225	129	brain	20
NCI	228	130	brain	53
NCI	229	130	breast	51
NCI	230	131	breast	25
NCI	231	132	acc	2
NCI	233	133	brain	16
NCI	234	133	brain	45
NCI	237	134	brain	25
NCI	239	134	breast	45
NCI	243	134	choroid	2
NCI	244	135	breast	22
NCI	245	136	breast	40
NCI	246	136	breast	37
NCI	250	137	ost	35
NCI	251	138	ost	14
NCI	253	138	acc	1
NCI	255	139	non.lfs	29
NCI	256	140	sts	41
NCI	257	140	non.lfs	28
NCI	259	141	breast	36
NCI	260	142	choroid	1
NCI	262	143	breast	28
NCI	263	144	breast	40
NCI	265	145	brain	13
NCI	266	145	non.lfs	31
NCI	267	146	breast	29
NCI	268	147	breast	28
DFCI	269	148	ost	11
DFCI	270	148	acc	1
NCI	271	149	breast	34
NCI	272	150	non.lfs	17
NCI	273	151	ost	14
NCI	274	151	breast	26
NCI	275	152	brain	27
NCI	276	152	sts	2
NCI	277	153	non.lfs	42
NCI	278	154	breast	30
NCI	281	155	brain	11
NCI	282	156	brain	19
NCI	284	156	brain	19
NCI	285	156	sts	0
NCI	286	157	sts	51
NCI	287	157	sts	17
NCI	288	158	breast	38
NCI	289	158	breast	31
NCI	290	159	breast	28
NCI	291	160	breast	28
DFCI	294	161	breast	29
NCI	295	162	breast	29
NCI	296	162	non.lfs	22
NCI	297	163	non.lfs	25
DFCI	298	164	sts	30
DFCI	299	165	breast	26
DFCI	300	166	breast	26
DFCI	301	167	breast	34
DFCI	304	169	ost	41
MDA_pros	305	170	acc	6
MDA_pros	306	171	acc	0
MDA_pros	307	172	acc	2
MDA_pros	308	173	acc	2
MDA_pros	309	174	acc	4
MDA_pros	310	175	acc	12
MDA_pros	311	176	acc	1
MDA_pros	312	177	non.lfs	54
MDA_pros	313	178	brain	5
CHOP	314	179	sts	3
CHOP	315	180	brain	1
CHOP	318	182	non.lfs	4
CHOP	319	183	acc	3
CHOP	320	184	leukemia	14
CHOP	323	187	brain	1
CHOP	324	188	ost	16
CHOP	325	189	sts	3
CHOP	326	190	sts	11
CHOP	327	191	ost	16
CHOP	329	192	acc	2
CHOP	330	193	acc	1
MDA_pros	331	194	sts	4
MDA_pros	332	195	non.lfs	14
MDA_pros	333	196	brain	7
MDA_pros	334	197	leukemia	13
MDA_pros	335	198	acc	3
MDA_pros	337	199	brain	7
MDA_pros	338	200	sts	19
MDA_pros	339	201	breast	36
MDA_pros	340	202	breast	30
MDA_pros	341	203	breast	22
MDA_pros	343	205	ost	12
MDA_pros	344	205	breast	20
MDA_pros	345	205	sts	13
MDA_pros	346	206	acc	1
MDA_pros	348	208	breast	36
MDA_pros	349	208	breast	46
MDA_pros	350	209	breast	25
MDA_pros	351	210	breast	27
MDA_pros	352	210	non.lfs	36
MDA_pros	353	211	breast	39
MDA_pros	354	211	sts	40
MDA_pros	355	211	breast	44
MDA_pros	356	211	brain	17
MDA_pros	357	212	breast	22
MDA_pros	358	212	non.lfs	41
MDA_pros	359	213	breast	28
MDA_pros	361	214	leukemia	11
MDA_pros	362	215	breast	21
MDA_pros	363	215	sts	2
MDA_pros	364	216	breast	27
MDA_pros	366	217	breast	23
MDA_pros	367	218	non.lfs	33
MDA_pros	368	219	acc	14
MDA_pros	372	222	breast	33
MDA_pros	375	223	ost	35
MDA_pros	377	224	leukemia	14
MDA_pros	380	224	brain	10
MDA_pros	382	225	sts	24
MDA_pros	383	225	non.lfs	29
MDA_pros	386	227	leukemia	13
MDA_pros	388	228	lung	30
MDA_pros	393	230	brain	20
MDA_pros	394	231	breast	35
MDA_pros	396	232	brain	4
MDA_pros	397	232	brain	0
MDA_pros	398	233	breast	27
MDA_pros	399	234	breast	35
MDA_pros	400	235	breast	27
MDA_pros	401	236	breast	25
MDA_pros	403	238	breast	33
MDA_pros	404	239	breast	33
MDA_pros	405	240	non.lfs	74
MDA_pros	406	241	breast	40
MDA_pros	408	243	breast	25
MDA_pros	409	244	breast	32
MDA_pros	410	245	non.lfs	48
MDA_pros	412	246	breast	25
MDA_pros	413	246	brain	10
MDA_pros	414	247	brain	1
MDA_pros	415	247	breast	37
MDA_pros	417	248	sts	1
MDA_pros	418	249	breast	25
MDA_pros	419	250	acc	2
MDA_pros	420	250	ost	14
MDA_pros	421	250	breast	27
MDA_pros	422	251	sts	1
MDA_pros	423	252	ost	27
MDA_pros	424	252	breast	26
MDA_pros	425	253	ost	11
MDA_pros	426	254	ost	7
MDA_pros	427	254	leukemia	16
MDA_pros	429	255	breast	32
MDA_pros	430	256	ost	15
MDA_pros	431	257	ost	10
MDA_pros	433	258	brain	1
MDA_pros	434	258	brain	24
MDA_pros	438	258	brain	15
MDA_pros	442	259	ost	9
MDA_pros	444	260	ost	16
MDA_pros	446	260	non.lfs	19
MDA_pros	449	261	ost	14
MDA_pros	450	261	sts	7
MDA_pros	452	262	ost	21
MDA_pros	453	263	ost	14
MDA_pros	454	264	ost	16
MDA_pros	455	265	ost	15
MDA_pros	456	266	ost	17
MDA_pros	457	267	acc	1
MDA_pros	458	268	acc	19
MDA_pros	459	269	sts	0
MDA_pros	460	270	breast	36
MDA_pros	461	271	breast	35
MDA_pros	462	272	non.lfs	65
MDA_pros	464	274	acc	1
MDA_pros	465	275	ost	25
MDA_pros	466	276	ost	14
MDA_pros	467	276	breast	28
MDA_pros	468	277	sts	3
MDA_pros	469	278	brain	24
MDA_pros	470	279	non.lfs	44
MDA_pros	472	279	sts	3
MDA_pros	473	280	acc	1
MDA_pros	474	281	breast	39
MDA_pros	475	281	ost	36
MDA_pros	476	282	breast	26
MDA_pros	480	284	breast	35
MDA_pros	481	284	breast	36
MDA_pros	482	285	brain	4
MDA_pros	484	286	non.lfs	25
MDA_pros	485	287	breast	30
MDA_pros	486	288	ost	20
MDA_pros	487	289	breast	25
MDA_pros	488	290	breast	31
MDA_pros	489	291	ost	21
MDA_pros	490	292	non.lfs	50
MDA_pros	491	293	brain	18
MDA_pros	492	294	non.lfs	36
MDA_pros	495	296	non.lfs	26
MDA_pros	496	297	non.lfs	24
MDA_pros	497	298	breast	26
MDA_pros	498	299	ost	13
MDA_pros	499	300	sts	2
MDA_pros	500	300	breast	35
MDA_pros	501	301	breast	31
MDA_pros	502	301	non.lfs	38
MDA_pros	503	302	breast	29
MDA_pros	504	303	sts	48
MDA_pros	505	304	ost	12
MDA_pros	506	304	brain	27
MDA_pros	507	305	breast	29
MDA_pros	508	306	sts	21
MDA_pros	509	307	ost	13
MDA_pros	510	308	sts	2
MDA_pros	511	309	sts	1
MDA_pros	512	310	acc	0
MDA_pros	513	311	brain	4
MDA_pros	514	312	sts	1
MDA_pros	515	313	lung	43
MDA_pros	517	314	non.lfs	2
MDA_pros	519	316	sts	21
MDA_pros	520	317	sts	1
MDA_pros	521	317	ost	15
MDA_pros	522	317	ost	16
MDA_pros	524	318	sts	18
MDA_pros	525	319	sts	3
MDA_pros	526	320	sts	15
MDA_pros	528	320	acc	1
MDA_pros	529	321	sts	1
MDA_pros	530	322	sts	57
MDA_pros	532	324	sts	10

## Sheet: Stringent_Criteria_ROC
	age.cut	tpr	fpr		Key
1	5	1	0.885093167701863		age.cut: cutoff value of the age
2	10	1	0.798136645962733		tpr: true prositive rate
3	15	1	0.742236024844721		fpr: false positive rate
4	20	1	0.673913043478261
5	25	0.952380952380952	0.521739130434783
6	30	0.952380952380952	0.406832298136646
7	35	0.904761904761905	0.332298136645963
8	40	0.785714285714286	0.229813664596273
9	45	0.761904761904762	0.149068322981366
10	50	0.571428571428571	0.127329192546584
11	55	0.523809523809524	0.0714285714285714
12	60	0.380952380952381	0.0527950310559006
13	65	0.333333333333333	0.0434782608695652
14	70	0.285714285714286	0.0434782608695652
15	75	0.214285714285714	0.0403726708074534
16	80	0.214285714285714	0.0403726708074534
17	85	0.214285714285714	0.0403726708074534
18	90	0.214285714285714	0.0403726708074534
19	95	0.214285714285714	0.0403726708074534
20	100	0.214285714285714	0.0403726708074534

## Sheet: Relaxed_Criteria_ROC
	age.cut	tpr	fpr		Key
1	5	1	0.978260869565217		age.cut: cutoff value of the age
2	10	1	0.978260869565217		tpr: true prositive rate
3	15	1	0.956521739130435		fpr: false positive rate
4	20	1	0.909937888198758
5	25	1	0.832298136645963
6	30	1	0.726708074534162
7	35	0.976190476190476	0.605590062111801
8	40	0.928571428571429	0.468944099378882
9	45	0.928571428571429	0.366459627329193
10	50	0.904761904761905	0.31055900621118
11	55	0.880952380952381	0.229813664596273
12	60	0.80952380952381	0.198757763975155
13	65	0.785714285714286	0.183229813664596
14	70	0.738095238095238	0.173913043478261
15	75	0.738095238095238	0.170807453416149
16	80	0.738095238095238	0.170807453416149
17	85	0.738095238095238	0.170807453416149
18	90	0.738095238095238	0.170807453416149
19	95	0.738095238095238	0.170807453416149
20	100	0.738095238095238	0.170807453416149
