# Supplementary material for: A pedigree-based prediction model identifies carriers of deleterious de novo mutations in families with Li-Fraumeni syndrome
Source: HighWire-hosted journal article supplement (doi:10.1101/gr.249599.119), 2020-08-01
Supplement: Supplementary_Table_S9.xlsx [file Supplementary_Table_S9.xlsx]

## Sheet: DNMs_and_Cancer_Types
Supplementary Table 9. Distribution of cancer types across mutation types among DNMs in the validation and discovery sets.
Mutation (GRCh37)	Mutation (GRCh38)	Amino Acid or cDNA change	Frequency validation set	Frequency discovery set	Total frequency	Cancer type in validation set	Cancer type in discovery set
NC_000017.10:g.7572927_7578554del	NC_000017.11:g.7669609_7676272del	del exon 2-8	0	1	1		ost;non.lfs
NC_000017.10:g.7572927_7579912del	NC_000017.11:g.7669609_7676594del	del exon 2-11	0	1	1		non.lfs;acc;sts
NC_000017.10:g.7574002C>G	NC_000017.11:g.7670684C>G	p.R342P	0	1	1		ost;breast
NC_000017.10:g.7574017C>T	NC_000017.11:g.7670699C>T	p.R337H	0	1	1		breast;lung;non.lfs
NC_000017.10:g.7574018G>A	NC_000017.11:g.7670700G>A	p.R337C	1	2	3	breast;non.lfs	breast(2);non.lfs
NC_000017.10:g.7574034C>T	NC_000017.11:g.7670716C>T	c.994-1G>A	0	1	1		sts;non.lfs
NC_000017.10:g.7576927C>A	NC_000017.11:7673609C>A	intron splice acceptor	1	0	1	breast
NC_000017.10:g.7576928T>C	NC_000017.11:g.7673610T>C	c.920-2A>G	1	0	1	non.lfs
NC_000017.10:g.7577090_7577100delinsTG	NC_000017.11:g.7673772_7673782delinsTG	c.838_848del11insCA	0	1	1		breast
NC_000017.10:g.7577091G>A	NC_000017.11:g.7673773G>A	p.R283C	1	1	2		breast
NC_000017.10:g.7577093C>G	NC_000017.11:g.7673775C>G	p.R282P	0	1	1		breast
NC_000017.10:g.7577094G>A	NC_000017.11:g.7673776G>A	p.R282W	2	1	3	acc;breast;leukemia;non.lfs	breast;sts
NC_000017.10:g.7577094G>C	NC_000017.11:g.7673776G>C	p.R282G	0	2	2		ost;brain;breast(2);non.lfs(2)
NC_000017.10:g.7577099G>A	NC_000017.11:g.7673781G>A	p.R280K	0	1	1		sts;non.lfs
NC_000017.10:g.7577105G>A	NC_000017.11:g.7673787G>A	p.P278L	1	0	1	acc;breast
NC_000017.10:g.7577117A>G	NC_000017.11:g.7673799A>G	p.V274A	1	1	2	sts;ost;breast	breast;ost;sts
NC_000017.10:g.7577120C>G	NC_000017.11:g.7673802C>G	p.R273P	1	0	1	breast
NC_000017.10:g.7577120C>T	NC_000017.11:g.7673802C>T	p.R273H	2	2	4	breast;ost;non.lfs	breast(2);sts;ost
NC_000017.10:g.7577121G>A	NC_000017.11:g.7673803G>A	p.R273C	1	0	1	brain;breast
NC_000017.10:g.7577141C>T	NC_000017.11:g.7673823C>T	p.G266E	1	0	1	sts
NC_000017.10:g.7577517_7577519ATG[1]	NC_000017.11:g.7674199_7674201ATG[1]	p.I255del3	1	0	1	sts;brain;breast
NC_000017.10:g.7577538_7577552del	NC_000017.11:g.7674220_7674234del	c.730_744del15	0	1	1		breast
NC_000017.10:g.7577538C>T	NC_000017.11:g.7674220C>T	p.R248Q	3	1	4	acc;breast;ost	sts
NC_000017.10:g.7577548C>T	NC_000017.11:g.7674230C>T	p.G245S	1	2	3	choroid	breast(2);brain;lung
NC_000017.10:g.7577559G>A	NC_000017.11:g.7674241G>A	p.S241F	1	0	1	sts;ost
NC_000017.10:g.7578175A>G	NC_000017.11:g.7674857A>G	c.672+2T>C	1	1	2	breast	non.lfs
NC_000017.10:g.7578190T>C	NC_000017.11:g.7674872T>C	p.Y220C	1	0	1	acc;breast
NC_000017.10:g.7578190T>G	NC_000017.11:g.7674872T>G	p.Y220S	1	1	2	sts;breast	ost;brain;breast
NC_000017.10:g.7578196A>C	NC_000017.11:g.7674878A>C	p.V218G	1	0	1	breast
NC_000017.10:g.7578212_7578214delinsTGG	NC_000017.11:g.7674894_7674896delinsTGG	p.R213W	0	1	1		breast;lung
NC_000017.10:g.7578212G>A	NC_000017.11:g.7674894G>A	p.R213*	1	1	2	breast	breast
NC_000017.10:g.7578263G>A	NC_000017.11:g.7674945G>A	p.R196*	2	2	4	acc;breast	ost;sts;breast;acc;non.lfs
NC_000017.10:g.7578370C>T	NC_000017.11:g.7675052C>T	c.559+1G>A	2	1	3	sts;breast;brain;ost	sts;breast
NC_000017.10:g.7578394T>C	NC_000017.11:g.7675076T>C	p.H179R	1	0	1	ost
NC_000017.10:g.7578406C>T	NC_000017.11:g.7675088C>T	p.R175H	0	2	2		acc;sts;breast;brain;non.lfs
NC_000017.10:g.7578440T>C	NC_000017.11:g.7675122T>C	p.K164*	1	0	1	breast;acc
NC_000017.10:g.7578454G>A	NC_000017.11:g.7675136G>A	p.A159D	1	0	1	breast
NC_000017.10:g.7578470_7578482del	NC_000017.11:g.7675152_7675164del	p.T150AfsX16	1	0	1	sts;breast
NC_000017.10:g.7578475G>A	NC_000017.11:g.7675157G>A	p.P152L	0	1	1		lung;non.lfs
NC_000017.10:g.7578508C>T	NC_000017.11:g.7675190C>T	p.C141Y	1	0	1	non.lfs;breast
NC_000017.10:g.7578525_7578540del	NC_000017.11:g.7675207_7675222del	p.K132fs	0	1	1		breast
NC_000017.10:g.7578527A>T	NC_000017.11:g.7675209A>T	p.C135S	0	1	1		breast
NC_000017.10:g.7578534C>G	NC_000017.11:g.7675216C>G	p.K132N	1	0	1	brain;ost;non.lfs
NC_000017.10:g.7578550G>A	NC_000017.11:g.7675232G>A	p.S127F	1	0	1	ost;lung;non.lfs
NC_000017.10:g.7579312C>A	NC_000017.11:g.7675994C>A	p.T125T	0	1	1		sts;breast;non.lfs
NC_000017.10:g.7579358C>G	NC_000017.11:g.7676040C>G	p.R110P	0	1	1		breast
NC_000017.10:g.7579369G>C	NC_000017.11:g.7676051G>C	p.S106R	0	1	1		breast;sts
NC_000017.10:g.7579699C>G	NC_000017.11:g.7676381C>G	c.96+1G>C	1	0	1	brain;breast
NC_000017.10:g.7579700_7579912del	NC_000017.11:g.7676382_7676594del	del exon 10-11	1	0	1	ost;breast
NA	NA	NA	5	4	9	sts;acc(2);brain;leukemia;non.lfs	sts(2);ost;brain;acc;non.lfs
		Total	42	40	82
