# Supplementary material for: A pedigree-based prediction model identifies carriers of deleterious de novo mutations in families with Li-Fraumeni syndrome
Source: HighWire-hosted journal article supplement (doi:10.1101/gr.249599.119), 2020-08-01
Supplement: Supplementary_Table_S10.xlsx [file Supplementary_Table_S10.xlsx]

## Sheet: DNMs_in_validation_set
Supplementary Table 10A: Frequency of de novo mutations in the validation set.
Mutation (GRCh37)	Mutation (GRCh38)	Amino Acid or cDNA change	MDA	NCI	DFCI	CHOP	TOTAL
NC_000017.10:g.7574018G>A	NC_000017.11:g.7670700G>A	p.R337C	0	1	0	0	1
NC_000017.10:g.7576927C>A	NC_000017.11:7673609C>A	intron splice acceptor	1	0	0	0	1
NC_000017.10:g.7576928T>C	NC_000017.11:g.7673610T>C	c.920-2A>G	1	0	0	0	1
NC_000017.10:g.7577091G>A	NC_000017.11:g.7673773G>A	p.R283C	0	1	0	0	1
NC_000017.10:g.7577094G>A	NC_000017.11:g.7673776G>A	p.R282W	2	0	0	0	2
NC_000017.10:g.7577105G>A	NC_000017.11:g.7673787G>A	p.P278L	1	0	0	0	1
NC_000017.10:g.7577117A>G	NC_000017.11:g.7673799A>G	p.V274A	1	0	0	0	1
NC_000017.10:g.7577120C>G	NC_000017.11:g.7673802C>G	p.R273P	1	0	0	0	1
NC_000017.10:g.7577120C>T	NC_000017.11:g.7673802C>T	p.R273H	2	0	0	0	2
NC_000017.10:g.7577121G>A	NC_000017.11:g.7673803G>A	p.R273C	0	1	0	0	1
NC_000017.10:g.7577141C>T	NC_000017.11:g.7673823C>T	p.G266E	1	0	0	0	1
NC_000017.10:g.7577517_7577519ATG[1]	NC_000017.11:g.7674199_7674201ATG[1]	p.I255del3	1	0	0	0	1
NC_000017.10:g.7577538C>T	NC_000017.11:g.7674220C>T	p.R248Q	2	1	0	0	3
NC_000017.10:g.7577548C>T	NC_000017.11:g.7674230C>T	p.G245S	0	0	1	0	1
NC_000017.10:g.7577559G>A	NC_000017.11:g.7674241G>A	p.S241F	1	0	0	0	1
NC_000017.10:g.7578175A>G	NC_000017.11:g.7674857A>G	c.672+2T>C	1	0	0	0	1
NC_000017.10:g.7578190T>C	NC_000017.11:g.7674872T>C	p.Y220C	1	0	0	0	1
NC_000017.10:g.7578190T>G	NC_000017.11:g.7674872T>G	p.Y220S	1	0	0	0	1
NC_000017.10:g.7578196A>C	NC_000017.11:g.7674878A>C	p.V218G	1	0	0	0	1
NC_000017.10:g.7578212G>A	NC_000017.11:g.7674894G>A	p.R213*	0	1	0	0	1
NC_000017.10:g.7578263G>A	NC_000017.11:g.7674945G>A	p.R196*	1	1	0	0	2
NC_000017.10:g.7578370C>T	NC_000017.11:g.7675052C>T	c.559+1G>A	1	1	0	0	2
NC_000017.10:g.7578394T>C	NC_000017.11:g.7675076T>C	p.H179R	1	0	0	0	1
NC_000017.10:g.7578440T>C	NC_000017.11:g.7675122T>C	p.K164*	1	0	0	0	1
NC_000017.10:g.7578454G>A	NC_000017.11:g.7675136G>A	p.A159D	1	0	0	0	1
NC_000017.10:g.7578470_7578482del	NC_000017.11:g.7675152_7675164del	p.T150AfsX16	1	0	0	0	1
NC_000017.10:g.7578508C>T	NC_000017.11:g.7675190C>T	p.C141Y	1	0	0	0	1
NC_000017.10:g.7578534C>G	NC_000017.11:g.7675216C>G	p.K132N	1	0	0	0	1
NC_000017.10:g.7578550G>A	NC_000017.11:g.7675232G>A	p.S127F	1	0	0	0	1
NC_000017.10:g.7579699C>G	NC_000017.11:g.7676381C>G	c.96+1G>C	0	1	0	0	1
NC_000017.10:g.7579700_7579912del	NC_000017.11:g.7676382_7676594del	del exon 10-11	0	0	1	0	1
NA	NA	NA	1	0	0	4	5
		Total	28	8	2	4	42

## Sheet: DNMs_in_discovery_set
Supplementary Table 10B: Frequency of de novo mutations in the discovery set.
Mutation (GRCh37)	Mutation (GRCh38)	Amino Acid or cDNA change	MDA	NCI	DFCI	CHOP	TOTAL
NC_000017.10:g.7572927_7578554del	NC_000017.11:g.7669609_7676272del	del exon 2-8	1	0	0	0	1
NC_000017.10:g.7572927_7579912del	NC_000017.11:g.7669609_7676594del	del exon 2-11	1	0	0	0	1
NC_000017.10:g.7574002C>G	NC_000017.11:g.7670684C>G	p.R342P	0	1	0	0	1
NC_000017.10:g.7574017C>T	NC_000017.11:g.7670699C>T	p.R337H	1	0	0	0	1
NC_000017.10:g.7574018G>A	NC_000017.11:g.7670700G>A	p.R337C	2	0	0	0	2
NC_000017.10:g.7574034C>T	NC_000017.11:g.7670716C>T	c.994-1G>A	0	0	1	0	1
NC_000017.10:g.7577090_7577100delinsTG	NC_000017.11:g.7673772_7673782delinsTG	c.838_848del11insCA	0	1	0	0	1
NC_000017.10:g.7577091G>A	NC_000017.11:g.7673773G>A	p.R283C	0	1	0	0	1
NC_000017.10:g.7577093C>G	NC_000017.11:g.7673775C>G	p.R282P	1	0	0	0	1
NC_000017.10:g.7577094G>C	NC_000017.11:g.7673776G>C	p.R282G	1	1	0	0	2
NC_000017.10:g.7577099G>A	NC_000017.11:g.7673781G>A	p.R280K	1	0	0	0	1
NC_000017.10:g.7577117A>G	NC_000017.11:g.7673799A>G	p.V274A	0	1	0	0	1
NC_000017.10:g.7577120C>T	NC_000017.11:g.7673802C>T	p.R273H	2	0	0	0	2
NC_000017.10:g.7577538_7577552del	NC_000017.11:g.7674220_7674234del	c.730_744del15	0	0	1	0	1
NC_000017.10:g.7577538C>T	NC_000017.11:g.7674220C>T	p.R248Q	1	0	0	0	1
NC_000017.10:g.7577548C>T	NC_000017.11:g.7674230C>T	p.G245S	2	0	0	0	2
NC_000017.10:g.7578175A>G	NC_000017.11:g.7674857A>G	c.672+2T>C	1	0	0	0	1
NC_000017.10:g.7578190T>G	NC_000017.11:g.7674872T>G	p.Y220S	1	0	0	0	1
NC_000017.10:g.7578212_7578214delinsTGG	NC_000017.11:g.7674894_7674896delinsTGG	p.R213W	0	0	2	0	2
NC_000017.10:g.7578212G>A	NC_000017.11:g.7674894G>A	p.R213*	0	0	1	0	1
NC_000017.10:g.7578263G>A	NC_000017.11:g.7674945G>A	p.R196*	1	0	1	0	2
NC_000017.10:g.7578370C>T	NC_000017.11:g.7675052C>T	c.559+1G>A	0	1	0	0	1
NC_000017.10:g.7578406C>T	NC_000017.11:g.7675088C>T	p.R175H	2	0	0	0	2
NC_000017.10:g.7578475G>A	NC_000017.11:g.7675157G>A	p.P152L	0	1	0	0	1
NC_000017.10:g.7578525_7578540del	NC_000017.11:g.7675207_7675222del	p.K132fs	1	0	0	0	1
NC_000017.10:g.7578527A>T	NC_000017.11:g.7675209A>T	p.C135S	0	0	1	0	1
NC_000017.10:g.7579312C>A	NC_000017.11:g.7675994C>A	p.T125T	1	0	0	0	1
NC_000017.10:g.7579358C>G	NC_000017.11:g.7676040C>G	p.R110P	0	0	1	0	1
NC_000017.10:g.7579369G>C	NC_000017.11:g.7676051G>C	p.S106R	1	0	0	0	1
NA	NA	NA	1	0	0	3	4
		Total	22	7	8	3	40

## Sheet: FMs_in_validation_set
Supplementary Table 10C: Frequency of familial mutations in the validation set.
Mutation (GRCh37)	Mutation (GRCh38)	Amino Acid or cDNA change	MDA	NCI	DFCI	CHOP	TOTAL
NC_000017.10:g.40544238del	NC_000017.11:g.42392220del	p.S241fs	2	0	0	0	2
NC_000017.10:g.7573987G>T	NC_000017.11:g.7670669G>T	p.A347D	0	4	0	0	4
NC_000017.10:g.7574003G>A	NC_000017.11:g.7670685G>A	p.R342*	2	3	1	0	6
NC_000017.10:g.7574017C>T	NC_000017.11:g.7670699C>T	p.R337H	1	5	0	0	6
NC_000017.10:g.7577022G>A	NC_000017.11:g.7673704G>A	p.R306*	1	2	1	0	4
NC_000017.10:g.7577069C>T	NC_000017.11:g.7673751C>T	p.R290H	1	0	1	0	2
NC_000017.10:g.7577082C>T	NC_000017.11:g.7673764C>T	p.E286K	0	4	0	0	4
NC_000017.10:g.7577091G>A	NC_000017.11:g.7673773G>A	p.R283C	1	2	1	0	4
NC_000017.10:g.7577094G>A	NC_000017.11:g.7673776G>A	p.R282W	2	0	0	0	2
NC_000017.10:g.7577097G>A	NC_000017.11:g.7673779G>A	p.D281N	1	0	0	0	1
NC_000017.10:g.7577099C>G	NC_000017.11:g.7673781C>G	p.R280T	1	0	0	0	1
NC_000017.10:g.7577106G>C	NC_000017.11:g.7673788G>C	p.P278A	1	0	0	0	1
NC_000017.10:g.7577114C>T	NC_000017.11:g.7673796C>T	p.C275Y	3	0	0	0	3
NC_000017.10:g.7577120C>T	NC_000017.11:g.7673802C>T	p.R273H	3	23	1	0	27
NC_000017.10:g.7577121G>A	NC_000017.11:g.7673803G>A	p.R273C	0	1	0	0	1
NC_000017.10:g.7577126T>A	NC_000017.11:g.7673808T>A	p.E271V	0	0	1	0	1
NC_000017.10:g.7577138C>T	NC_000017.11:g.7673820C>T	p.R267Q	3	2	0	0	5
NC_000017.10:g.7577139G>A	NC_000017.11:g.7673821G>A	p.R267W	0	0	1	0	1
NC_000017.10:g.7577521T>C	NC_000017.11:g.7674203T>C	p.I254V	2	0	0	0	2
NC_000017.10:g.7577530T>G	NC_000017.11:g.7674212T>G	p.I251L	5	0	0	0	5
NC_000017.10:g.7577538C>T	NC_000017.11:g.7674220C>T	p.R248Q	7	10	0	0	17
NC_000017.10:g.7577539G>A	NC_000017.11:g.7674221G>A	p.R248W	10	8	1	0	19
NC_000017.10:g.7577543C>T	NC_000017.11:g.7674225C>T	p.M246I	2	0	0	0	2
NC_000017.10:g.7577545T>C	NC_000017.11:g.7674227>C	p.M246V	0	4	0	0	4
NC_000017.10:g.7577548C>T	NC_000017.11:g.7674230C>T	p.G245S	0	8	2	0	10
NC_000017.10:g.7577550C>T	NC_000017.11:g.7674232C>T	p.G244D	0	3	0	0	3
NC_000017.10:g.7577559G>T	NC_000017.11:g.7674241G>T	p.S241Y	2	0	0	0	2
NC_000017.10:g.7577570C>T	NC_000017.11:g.7674252C>T	p.M237I	1	0	0	0	1
NC_000017.10:g.7578190T>C	NC_000017.11:g.7674872T>C	p.Y220C	2	0	0	0	2
NC_000017.10:g.7578190T>G	NC_000017.11:g.7674872T>G	p.Y220S	1	0	0	0	1
NC_000017.10:g.7578196A>C	NC_000017.11:g.7674878A>C	p.V218G	1	0	0	0	1
NC_000017.10:g.7578206T>G	NC_000017.11:g.7674888>G	p.S215R	0	0	1	0	1
NC_000017.10:g.7578211C>T	NC_000017.11:g.7674893C>T	p.R213Q	0	0	2	0	2
NC_000017.10:g.7578212G>T	NC_000017.11:g.7674894G>T	p.R213*	0	0	1	0	1
NC_000017.10:g.7578223del	NC_000017.11:g.7674905del	p.R209fs	4	0	0	0	4
NC_000017.10:g.7578235T>C	NC_000017.11:g.7674917T>C	p.Y205C	0	0	1	0	1
NC_000017.10:g.7578262C>G	NC_000017.11:g.7674944C>G	p.R196P	0	0	1	0	1
NC_000017.10:g.7578263G>A	NC_000017.11:g.7674945G>A	p.R196*	5	1	0	0	6
NC_000017.10:g.7578271T>C	NC_000017.11:g.7674953T>C	p.H193R	0	0	1	0	1
NC_000017.10:g.7578272G>A	NC_000017.11:g.7674954G>A	p.H193Y	0	1	0	0	1
NC_000017.10:g.7578280G>A	NC_000017.11:g.7674962G>A	p.P190L	0	3	0	0	3
NC_000017.10:g.7578388C>T	NC_000017.11:g.7675070C>T	p.R181H	2	4	0	0	6
NC_000017.10:g.7578389G>A	NC_000017.11:g.7675071G>A	p.R181C	2	11	0	0	13
NC_000017.10:g.7578391del	NC_000017.11:g.7675073del	p.E180fs	1	0	0	0	1
NC_000017.10:g.7578400G>C	NC_000017.11:g.7675082G>C	p.P177R	2	0	0	0	2
NC_000017.10:g.7578406C>T	NC_000017.11:g.7675088C>T	p.R175H	4	1	2	0	7
NC_000017.10:g.7578442T>C	NC_000017.11:g.7675124T>C	p.Y163C	0	2	0	0	2
NC_000017.10:g.7578443A>C	NC_000017.11:g.7675125A>C	p.Y163H	0	1	0	0	1
NC_000017.10:g.7578457C>T	NC_000017.11:g.7675139C>T	p.R158H	2	8	0	0	10
NC_000017.10:g.7578458G>A	NC_000017.11:g.7675140G>A	p.R158C	1	0	0	0	1
NC_000017.10:g.7578475G>A	NC_000017.11:g.7675157G>A	p.P152L	0	7	0	0	7
NC_000017.10:g.7578478G>C	NC_000017.11:g.7675160G>C	p.P151R	0	3	1	0	4
NC_000017.10:g.7578492C>T	NC_000017.11:g.7675174C>T	p.W146*	3	0	0	0	3
NC_000017.10:g.7578535T>C	NC_000017.11:g.7675217T>C	p.K132R	0	0	1	0	1
NC_000017.10:g.7578541A>G	NC_000017.11:g.7675223A>G	p.L130P	0	3	0	0	3
NC_000017.10:g.7579312C>A	NC_000017.11:g.7675994C>A	p.T125T	3	11	0	0	14
NC_000017.10:g.7579355A>G	NC_000017.11:g.7676037A>G	p.L111P	0	1	0	0	1
NC_000017.10:g.7579358C>A	NC_000017.11:g.7676040C>A	p.R110L	2	1	0	0	3
NC_000017.10:g.7579545del	NC_000017.11:g.7676227del	p.D48fs	1	0	0	0	1
NC_000017.10:g.7579571_7579572del	NC_000017.11:g.7676253_7676254del	p.A39delCA	2	0	0	0	2
NA	NA	NA	17	40	13	5	75
		Total	106	177	34	5	322

## Sheet: FMs_in_discovery_set
Supplementary Table 10D: Frequency of familial mutations in the discovery set.
Mutation (GRCh37)	Mutation (GRCh38)	Amino Acid or cDNA change	MDA	NCI	DFCI	CHOP	TOTAL
NC_000017.10:g.7574003G>A	NC_000017.11:g.7670685G>A	p.R342*	0	0	1	0	1
NC_000017.10:g.7574012C>A	NC_000017.11:g.7670694C>A	p.E339*	0	0	1	0	1
NC_000017.10:g.7574017C>T	NC_000017.11:g.7670699C>T	p.R337H	1	0	0	0	1
NC_000017.10:g.7574018G>A	NC_000017.11:g.7670700G>A	p.R337C	0	0	1	0	1
NC_000017.10:g.7574027C>G	NC_000017.11:g.7670709C>G	p.G334R	0	0	3	0	3
NC_000017.10:g.7576897G>A	NC_000017.11:g.7673579G>A	p.Q317*	1	0	0	0	1
NC_000017.10:g.7577022G>A	NC_000017.11:g.7673704G>A	p.R306*	0	0	2	0	2
NC_000017.10:g.7577069C>T	NC_000017.11:g.7673751C>T	p.R290H	0	0	1	0	1
NC_000017.10:g.7577091G>A	NC_000017.11:g.7673773G>A	p.R283C	1	0	0	0	1
NC_000017.10:g.7577094G>A	NC_000017.11:g.7673776G>A	p.R282W	3	0	1	0	4
NC_000017.10:g.7577120C>T	NC_000017.11:g.7673802C>T	p.R273H	3	0	4	0	7
NC_000017.10:g.7577121G>A	NC_000017.11:g.7673803G>A	p.R273C	1	0	1	0	2
NC_000017.10:g.7577129A>C	NC_000017.11:g.7673811A>C	p.F270C	2	0	0	0	2
NC_000017.10:g.7577139G>A	NC_000017.11:g.7673821G>A	p.R267W	1	0	0	0	1
NC_000017.10:g.7577509_7577510delinsAA	NC_000017.11:g.7674191_7674192delinsAA	p.E258K	0	0	3	0	3
NC_000017.10:g.7577509C>A	NC_000017.11:g.7674191C>A	p.E258*	1	0	0	0	1
NC_000017.10:g.7577538C>T	NC_000017.11:g.7674220C>T	p.R248Q	0	0	2	0	2
NC_000017.10:g.7577539G>A	NC_000017.11:g.7674221G>A	p.R248W	1	0	0	0	1
NC_000017.10:g.7577545T>C	NC_000017.11:g.7674227T>C	p.M246V	2	0	0	0	2
NC_000017.10:g.7577548C>A	NC_000017.11:g.7674230C>A	p.G245C	0	0	2	0	2
NC_000017.10:g.7577548C>T	NC_000017.11:g.7674230C>T	p.G245S	1	0	0	0	1
NC_000017.10:g.7578187delT	NC_000017.11:g.7674869delT	p.E221fs	5	0	0	0	5
NC_000017.10:g.7578190T>C	NC_000017.11:g.7674872T>C	p.Y220C	0	0	2	0	2
NC_000017.10:g.7578191A>G	NC_000017.11:g.7674873A>G	p.Y220H	0	0	2	0	2
NC_000017.10:g.7578211C>G	NC_000017.11:g.7674893C>G	p.R213P	0	0	1	0	1
NC_000017.10:g.7578211C>T	NC_000017.11:g.7674893C>T	p.R213Q	0	0	2	0	2
NC_000017.10:g.7578212G>A	NC_000017.11:g.7674894G>A	p.R213*	0	0	1	0	1
NC_000017.10:g.7578235T>C	NC_000017.11:g.7674917T>C	p.Y205C	1	0	0	0	1
NC_000017.10:g.7578263G>A	NC_000017.11:g.7674945G>A	p.R196*	0	0	2	0	2
NC_000017.10:g.7578269G>A	NC_000017.11:g.7674951G>A	p.L194F	2	0	0	0	2
NC_000017.10:g.7578271T>A	NC_000017.11:g.7674953T>A	p.H193L	1	0	0	0	1
NC_000017.10:g.7578388C>T	NC_000017.11:g.7675070C>T	p.R181H	0	0	2	0	2
NC_000017.10:g.7578406C>T	NC_000017.11:g.7675088C>T	p.R175H	0	0	2	0	2
NC_000017.10:g.7578443A>G	NC_000017.11:g.7675125A>G	p.Y163H	0	0	1	0	1
NC_000017.10:g.7578457C>T	NC_000017.11:g.7675139C>T	p.R158H	1	0	2	0	3
NC_000017.10:g.7578461C>A	NC_000017.11:g.7675143C>A	p.V157F	2	0	0	0	2
NC_000017.10:g.7578467_7578473del	NC_000017.11:g.7675149_7675155del	p.G154fs	1	0	0	0	1
NC_000017.10:g.7578475G>A	NC_000017.11:g.7675157G>A	p.P152L	0	0	2	0	2
NC_000017.10:g.7578479G>C	NC_000017.11:g.7675161G>C	p.P151A	2	0	0	0	2
NC_000017.10:g.7578492C>T	NC_000017.11:g.7675174C>T	p.W146*	2	0	0	0	2
NC_000017.10:g.7578524G>A	NC_000017.11:g.7675206G>A	p.Q136*	1	0	0	0	1
NC_000017.10:g.7578541A>G	NC_000017.11:g.7675223A>G	p.L130P	0	0	1	0	1
NC_000017.10:g.7578541A>T	NC_000017.11:g.7675223A>T	p.L130H	4	0	1	0	5
NC_000017.10:g.7579312C>A	NC_000017.11:g.7675994C>A	p.T125T	2	0	2	0	4
NC_000017.10:g.7579358C>A	NC_000017.11:g.7676040C>A	p.R110L	0	0	1	0	1
NC_000017.10:g.7579503C>A	NC_000017.11:g.7676185C>A	p.E62*	2	0	0	0	2
NC_000017.10:g.7579530_7579533delinsCAGGTC	NC_000017.11:g.7676212_7676215delinsCAGGTC	p.Q52Dfs*	1	0	0	0	1
NC_000017.10:g.7676180delinsTCT	NC_000017.11:g.7772862_7772862delinsTCT	p.A63fs	3	0	0	0	3
NA	NA	NA	6	5	18	5	34
		Total	54	5	64	5	128
