# Supplementary material for: A pedigree-based prediction model identifies carriers of deleterious de novo mutations in families with Li-Fraumeni syndrome
Source: HighWire-hosted journal article supplement (doi:10.1101/gr.249599.119), 2020-08-01
Supplement: Supplementary_Table_S11.xlsx [file Supplementary_Table_S11.xlsx]

## Sheet: BRCA_Cohort_Mutation_Data
Center.ID	File.ID	ID	gene	denovo_probability	ethnic	pedigree_size		Key
2	100003.dat	3	BRCA2	0.385633053	AJ	19		denovo_probability: probability of de novo mutation
2	100005.dat	9	BRCA1	0.123304102	AJ	17		ethnic: ethnicity of the family, AJ stands for Ashkenazi Jewish
2	100006.dat	3	BRCA1	0.001646023	nonAJ	21		pedigree_size: number of family members
2	100008.dat	5	BRCA1	0.001770079	nonAJ	42
2	100008.dat	6	BRCA1	0.128507292	nonAJ	42
2	100008.dat	8	BRCA1	0.000411337	nonAJ	42
2	100008.dat	12	BRCA1	0.0008482	nonAJ	42
2	100010.dat	4	BRCA1	0.000110157	nonAJ	34
2	100013.dat	3	BRCA1	0.088276897	nonAJ	23
2	100013.dat	11	BRCA1	0.023370725	nonAJ	23
2	100013.dat	17	BRCA1	0.079634073	nonAJ	23
2	100015.dat	21	BRCA1	0.023069872	nonAJ	28
2	100022.dat	4	BRCA2	0.020226789	nonAJ	26
2	100022.dat	5	BRCA2	0.131584505	nonAJ	26
2	100022.dat	6	BRCA2	0.019257576	nonAJ	26
2	100025.dat	4	BRCA1	0.002332388	AJ	18
2	100026.dat	10	BRCA1	9.46E-05	nonAJ	35
2	100026.dat	21	BRCA1	3.42E-05	nonAJ	35
2	100030.dat	5	BRCA1	0.00208063	AJ	16
2	100034.dat	4	BRCA2	0.000118911	nonAJ	50
2	100034.dat	7	BRCA2	0.003775541	nonAJ	50
2	100034.dat	8	BRCA2	0.02549448	nonAJ	50
2	100037.dat	6	BRCA1	0.010673568	nonAJ	29
2	100037.dat	8	BRCA1	0.001376745	nonAJ	29
2	100043.dat	4	BRCA1	4.80E-05	nonAJ	14
2	100044.dat	6	BRCA2	0.034625589	nonAJ	31
2	100050.dat	6	BRCA2	0.000226317	nonAJ	25
2	100050.dat	7	BRCA2	0.000207172	nonAJ	25
2	100051.dat	3	BRCA1	0.013068051	AJ	18
2	100053.dat	4	BRCA2	0.007893326	nonAJ	27
2	100066.dat	3	BRCA1	0.161398332	nonAJ	16
2	100068.dat	8	BRCA2	0.202038392	AJ	20
2	100076.dat	3	BRCA2	0.050708277	nonAJ	28
2	100076.dat	6	BRCA2	0.056996809	nonAJ	28
2	100086.dat	5	BRCA1	0.002391826	AJ	24
2	100091.dat	6	BRCA1	0.021189087	AJ	17
2	100113.dat	8	BRCA2	8.29E-05	nonAJ	20
2	100125.dat	6	BRCA1	0.016416746	nonAJ	18
2	100126.dat	6	BRCA1	0.003532295	AJ	23
2	100126.dat	7	BRCA1	0.003616852	AJ	23
2	100140.dat	8	BRCA2	0.000105646	nonAJ	28
2	100140.dat	9	BRCA2	0.00011523	nonAJ	28
2	100140.dat	10	BRCA2	0.057603319	nonAJ	28
2	100155.dat	6	BRCA2	0.001407534	nonAJ	25
2	100166.dat	3	BRCA2	0.396102087	nonAJ	16
2	100166.dat	4	BRCA2	0.004818033	nonAJ	16
2	100166.dat	5	BRCA2	0.004812951	nonAJ	16
2	100186.dat	3	BRCA1	0.190592466	nonAJ	14
2	100186.dat	5	BRCA1	0.01641616	nonAJ	14
2	100198.dat	6	BRCA2	0.051170349	AJ	16
2	100202.dat	10	BRCA1	0.001082271	nonAJ	39
2	100202.dat	12	BRCA1	0.001174595	nonAJ	39
2	100202.dat	13	BRCA1	0.018068816	nonAJ	39
2	100202.dat	22	BRCA1	0.002046282	nonAJ	39
2	100211.dat	3	BRCA2	0.318525783	nonAJ	34
2	100212.dat	2	BRCA1	0.016845015	nonAJ	15
2	100212.dat	5	BRCA1	0.002281375	nonAJ	15
2	100213.dat	3	BRCA1	0.164378828	nonAJ	21
2	100213.dat	6	BRCA1	0.026262029	nonAJ	21
2	100213.dat	7	BRCA1	0.026058818	nonAJ	21
2	100214.dat	3	BRCA2	0.010935693	AJ	17
2	100214.dat	5	BRCA2	0.002199238	AJ	17
2	100233.dat	6	BRCA1	0.001019997	nonAJ	17
2	100235.dat	2	BRCA1	0.041773992	nonAJ	22
2	100242.dat	4	BRCA2	0.044027652	nonAJ	12
2	100242.dat	5	BRCA2	0.044205762	nonAJ	12

## Sheet: BRCA_Cohort_Cancer_Data
Center.ID	File.ID	ID	AffectedBreast	AffectedOvary	ContralateralBreast	AgeBreast	AgeOvary	AgeBreastContralateral		Key
2	100003.dat	3	1	0	0	42				AffectedBreast: status of being affected with breast cancer
2	100005.dat	9	1	0	1	39		50		AffectedOvary: status of being affected with ovarian cancer
2	100008.dat	5	1	0	0	48				ContralateralBreast: status of being affected with contralateral breast cancer
2	100008.dat	6	1	1	0	38	50			AgeBreast: age of diagnosis of breast cancer
2	100013.dat	17	1	0	0	52				ageOvary: age of diagnosis of ovarian cancer
2	100015.dat	21	1	1	0	50	50			AgeBreastContralateral: age of diagnosis of contralateral breast cancer
2	100022.dat	5	1	0	0	44
2	100026.dat	10	0	1	0		59
2	100034.dat	7	1	0	0	62
2	100034.dat	8	1	0	0	65
2	100037.dat	6	1	0	0	41
2	100044.dat	6	1	0	0	38
2	100050.dat	6	1	0	0	36
2	100050.dat	7	1	0	0	38
2	100066.dat	3	1	0	0	64
2	100068.dat	8	1	0	0	42
2	100125.dat	6	0	1	0		54
2	100140.dat	10	1	1	1	41	44	45
2	100155.dat	6	1	0	0	49
2	100166.dat	3	1	0	0	42
2	100202.dat	13	0	1	0		43
2	100211.dat	3	1	0	0	51
2	100212.dat	5	1	0	0	34
2	100214.dat	3	1	0	0	66
